# Supplementary material for: Comparison of water networks in plant and cyanobacterial photosystem II based on a 2.44 Å resolution structure from Arabidopsis thaliana
Source: Research Square preprint supplement (doi:10.21203/rs.3.rs-6604913/v1), 2025-05-20
Supplement: Supplementary file 1 [file b3e5f56429aa4cbf5605b2f3.docx]

 Supplementary Materials for

**Comparison of water networks in plant and cyanobacterial photosystem II based on a 2.44 Å resolution structure from *Arabidopsis thaliana***

Jack Forsman1,2†*, André Graça1†, Abuzer Orkun Aydin2, Michael Hall1, Rana Hussein3,4, Wolfgang P. Schröder1,5*, Johannes Messinger2,5*


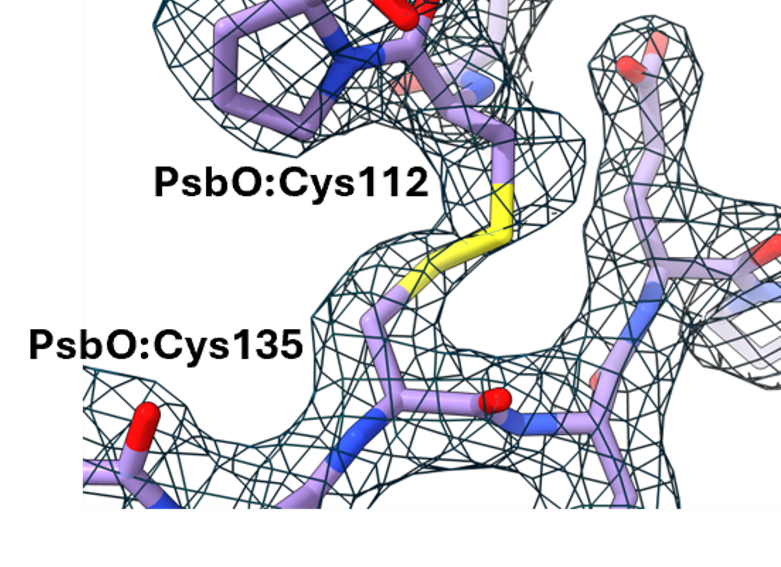


**Supplementary Figure 1:** A frequently damaged disulfide bond in the PsbO protein with the associated CryoEM map density. This disulfide bond was largely intact in this structure. PsbO residues are shown as purple sticks with oxygen atoms shown in red, nitrogen atoms shown in blue, sulfur atoms are shown in yellow. The Coulomb potential map of the locally sharpened CryoEM map at a contour level of 1.5 RMSD is shown as a black mesh.


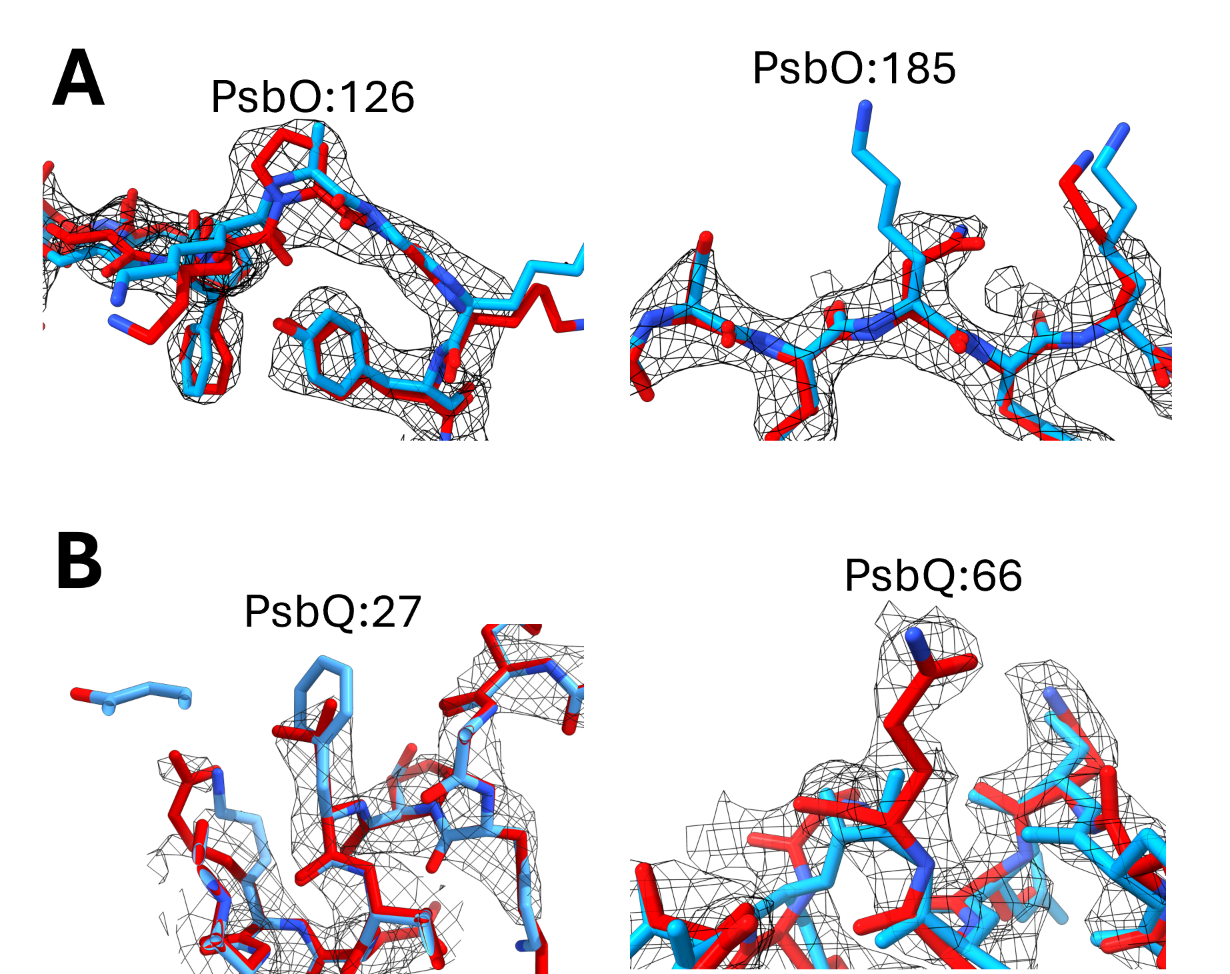


**Supplementary Figure 2:** Comparison of the different isoforms of PsbO and PsbQ. Atomic models of PsbO1 and PsbQ1 (red) were aligned with atomic models of PsbO2 and PsbQ2 (blue) and fit into the locally sharpened Coulomb potential map at a contour level of 1.29 RMSD. **(A)** Comparison of the two PsbO isoforms at position 126and 185 shows that the residues of PsbO1 fit the Coulomb potential map better than PsbO2. **(B)** Comparison of the PsbQ isoforms at position 27and 66 shows that the residues of PsbQ1 fit the Coulomb potential map better than PsbQ2.


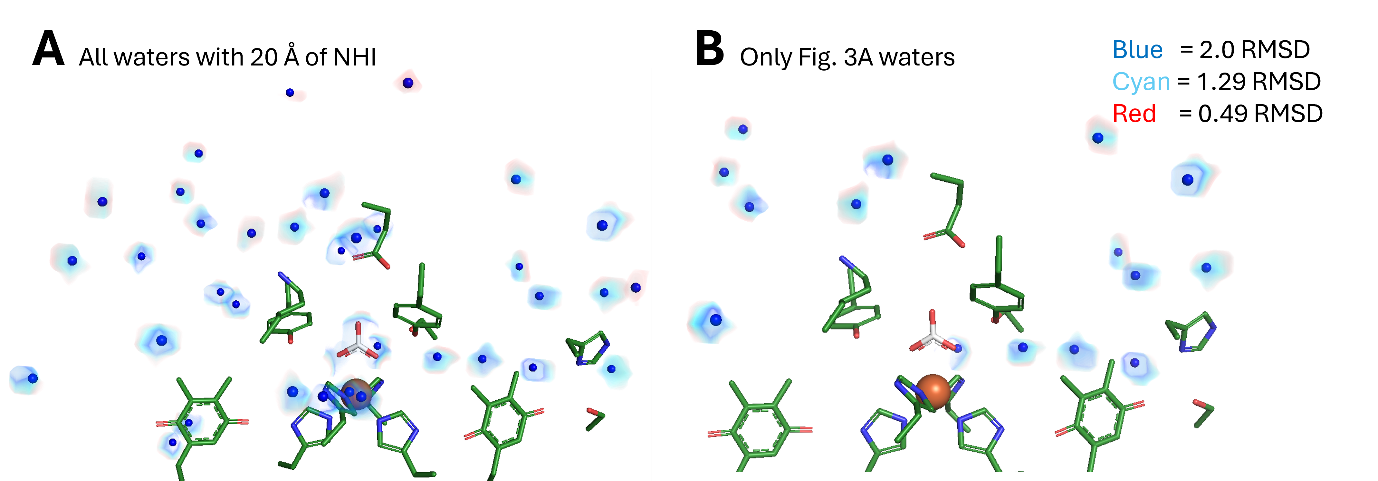


**Supplementary Figure 3:** Modelling of water molecules into electron density blobs on the acceptor side of the Arabidopsis structure. **(A)** All of the waters within 20 Å of the non-heme iron are shown blue spheres. The coloumb potential density from the locally sharpened map is shown for a radius of 1.3 Å around the modelled waters at 2 RMSD (blue), 1.29 RMSD (cyan) or 0.49 RMSD (red). QA, QB and the important residues D1:H215, E244,Y246, H252, S264, S268, H272, D2: H214, Y244, K268, H268 are shown as green sticks, with red and blue sections indicating, oxygen and nitrogen, respectively. **(B)** The same as panel **(A)**, but only showing the waters which were visible in Fig 3A. Several waters were omitted in Fig. 3A for clarity.


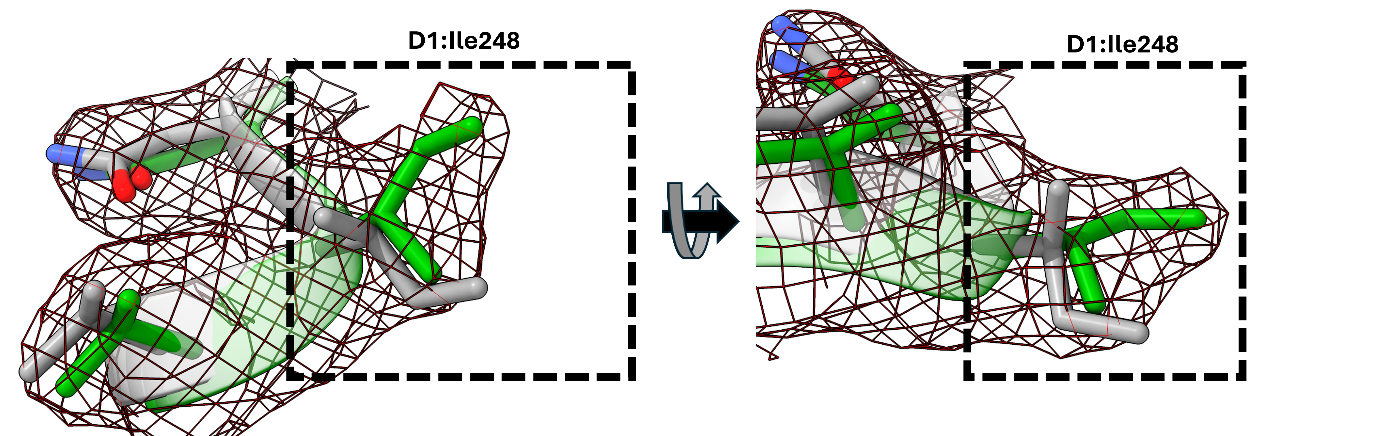


**Supplementary Figure 4:** The D1:Ile248 residue in the current Arabidopsis model (green) with the neighbouring residue on each side aligned with the same residues from the T.vestitus model (grey) (9EVX). The coulomb potential map from the full unsharpened map at a contour level of 2.11 RMSD is shown as a red mesh. A black box indicates the residue of interest (D1:Ile248). The two images shown different angles of the same map/model.


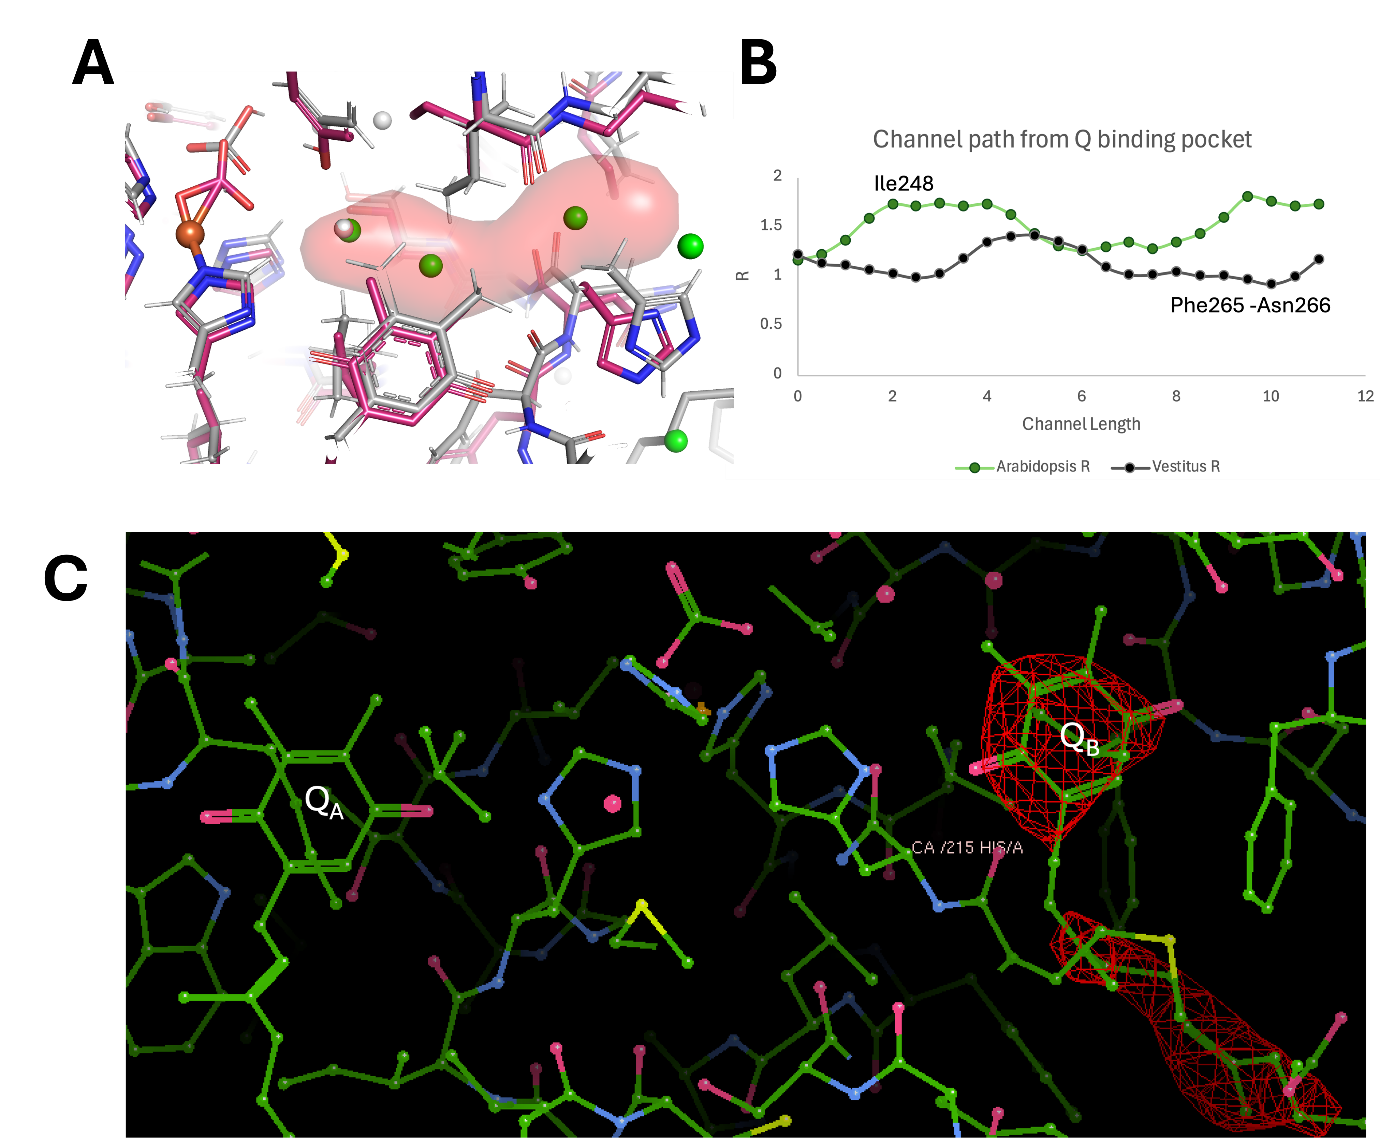


**Supplementary Figure 5:** Difference map analysis at the QB site. The B-factor of QB was adjusted to match the average B-factor of QA, and a difference map was generated using Servalcat (Yamashita et al., 2021). The FoFc map reveals a strong negative difference in density (shown in red mesh) at the QB site, suggesting reduced occupancy or potential higher mobility of QB in our Arabidopsis PSII structure. The sigma value of the map is 32.

Yamashita K, Palmer CM, Burnley T, Murshudov GN. Cryo-EM single-particle structure refinement and map calculation using Servalcat. (2021) *Acta Crystallogr D Struct Biol*. 77(10),1282-1291.


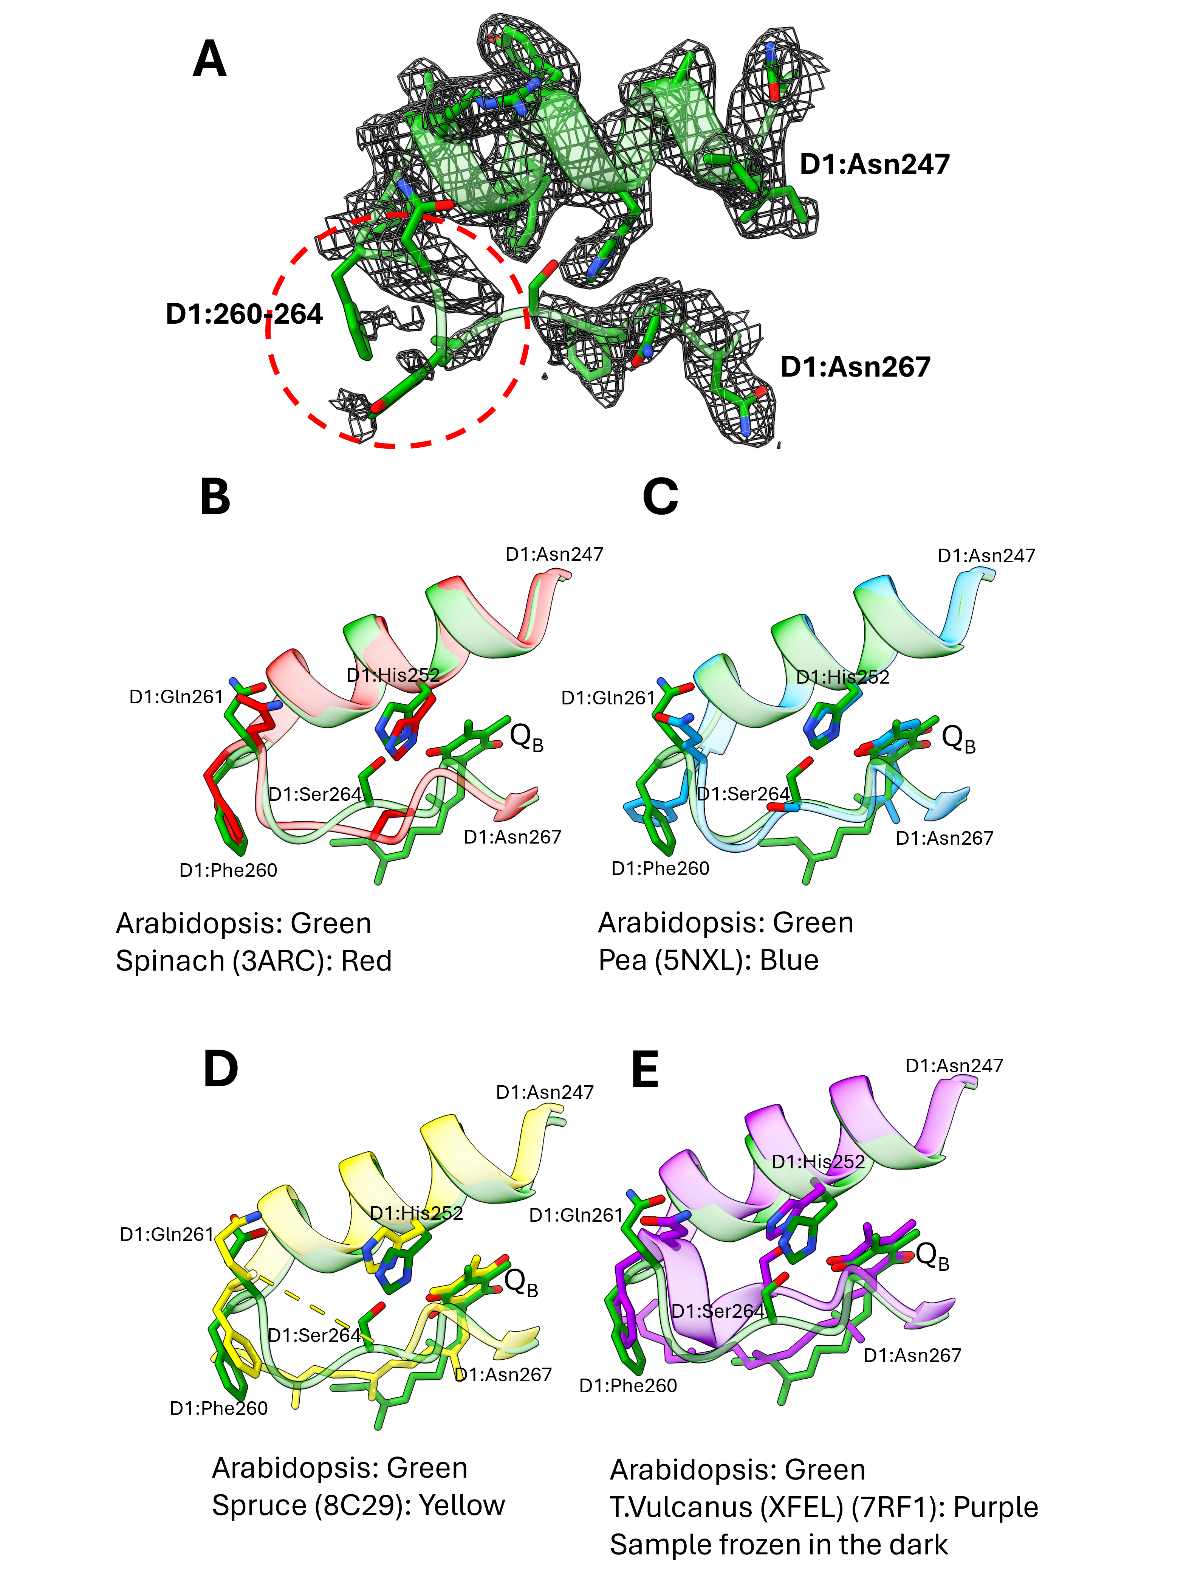


**Supplementary Figure 6:** Comparison of the protein structure around the QB binding pocket in various species. **(A)** The fitting of the D1:247-267 region in the current Arabidopsis model into the Coulomb potential map. The model is shown in green with red and blue sections indicating oxygen and nitrogen atoms, respectively. The Locally sharpened map at a contour level of 1.29 RMSD is shown as a black mesh. The D1:260-264 region which lacks density is circled. The PsbA (D1) subunit was aligned to the D1 subunit in other species using the ChimeraX tool “Matchmaker”. The QB, D1:His252, D1:Phe260, D1:Gln261 and D1:Ser264 residues are shown as sticks. Arabidopsis thaliana (green, current structure) is compared to **B.** Spinacia oleracia (red, 3JCU), **C.** Pisum sativum (blue, 5XNL), **D.** Pisia abies (yellow, 8C29), **E.** Thermosynechococcus vulcanus (XFEL) (purple, 7RF1). In panel **(D)**, the dashed yellow line indicates where residues were not modelled due to low map resolution.


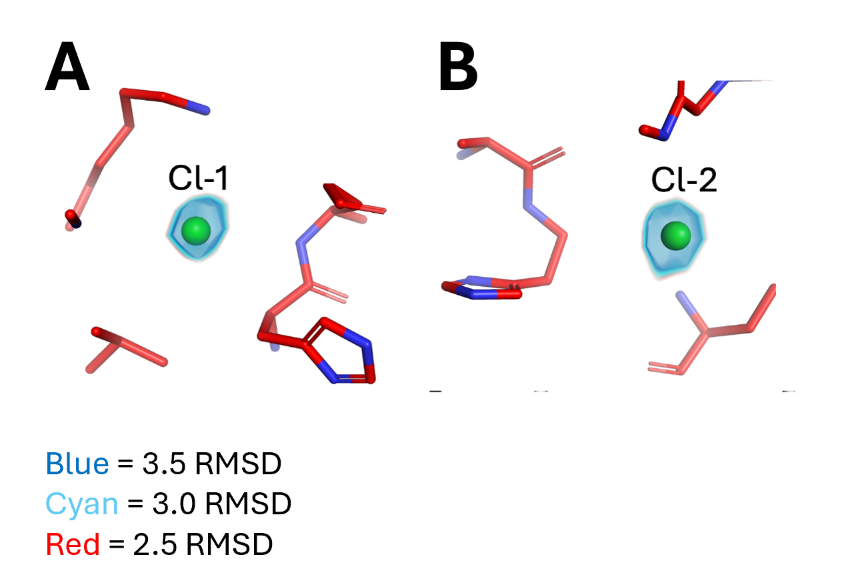


**Supplementary Figure 7:** Coulomb potential density around the Cl1 **(A)** and Cl2 **(B)** Chloride ions. Chloride ions are shown as green balls, with nearby residues as red sticks. The coulomb potential from the Locally sharpened map is shown at contour levels of 3.5 RMSD (blue), 3.0 RMSD (cyan) and 2.5 RMSD (red).


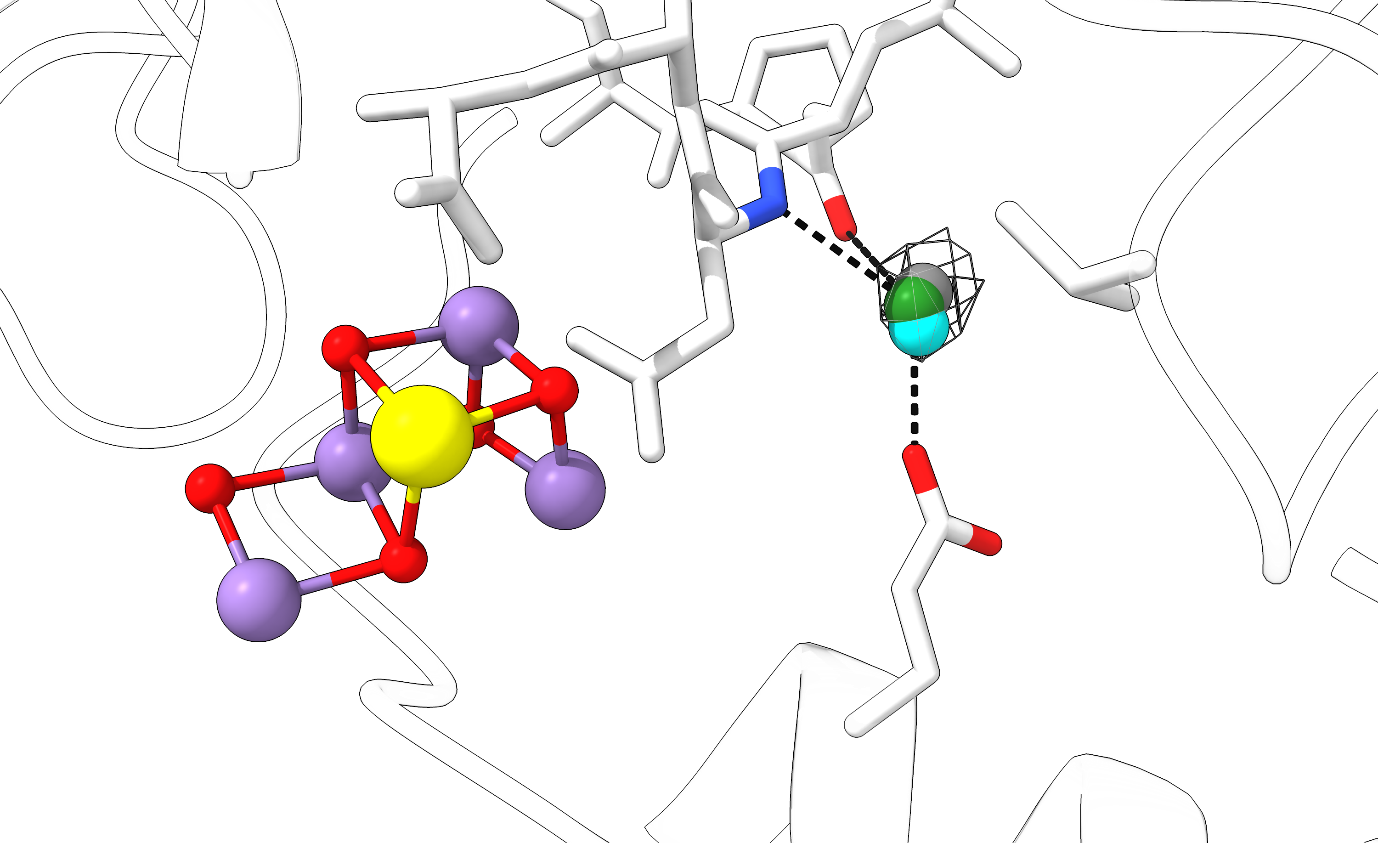


**Supplementary Figure 8:** Potential hydrogen bonding interactions between the water modelled at the bottleneck region of the O1 channel and the surrounding protein structure. A water in this position is found in Arabidopsis (current structure, green sphere), T. vestitus (9EVX, grey sphere) and Pea (5XNL, cyan sphere). Potential hydrogen bonds are shown as black dashed lines, between the water and the D1:E329, D1:P340 and D1:D342 residues, corresponding to distances of 2.7 Å, 3.5 Å and 3.0 Å, respectively. The mesh around the bottleneck water represents the Coulomb density from the locally sharpened Coulomb potential map at a contour level of 1.29 RMSD.


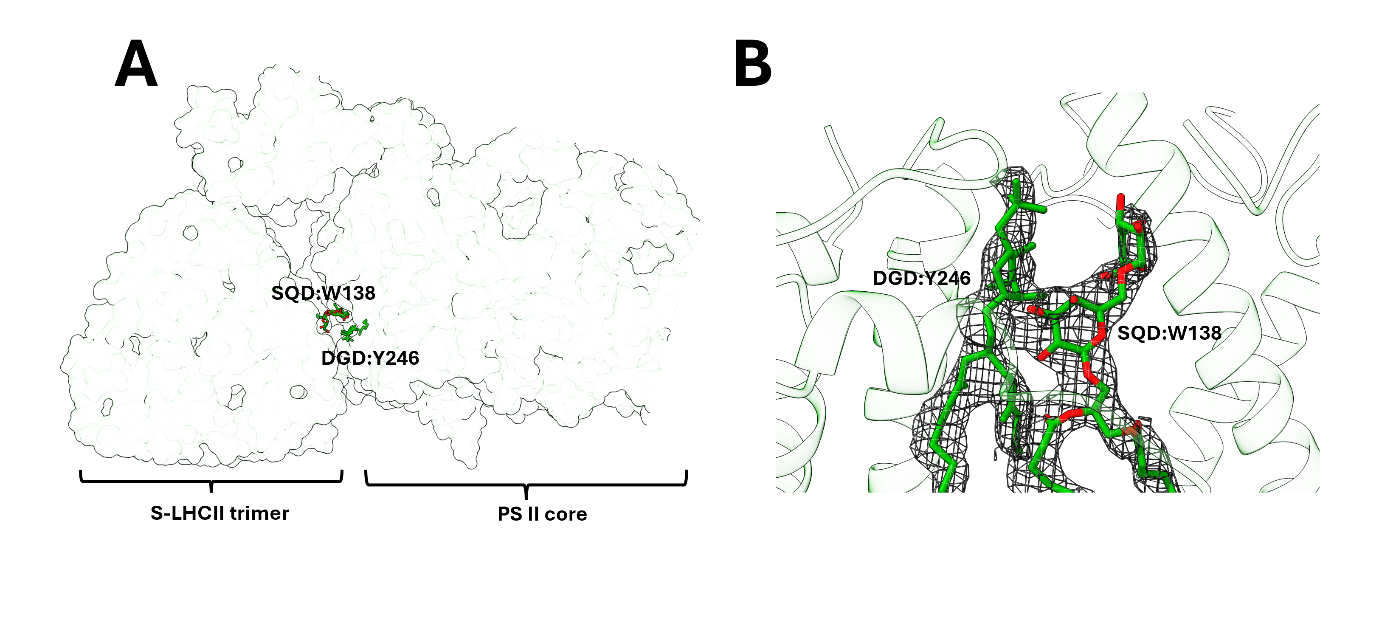


**Supplementary Figure 9:** Digalactosyl diacylglycerol (DGD) and sulfoquinovosyl diacylglycerol (SQD) lipids found at the interface between the PS II core and the LHC II trimer. **(A)** Location of the SQD:W138 and DGD:Y246 lipids within the PS II structure. The surface of the PS II core and strongly bound LHC II timer is shown in faint green. The newly modelled SQD and DGD lipids are shown as sticks. **(B)** The fitting of the lipids within the locally sharpened coulomb potential map at a contour level of 1.29 RMSD. The map is shown as a black mesh. The lipids are shown in green with red sections indicating oxygen atoms.


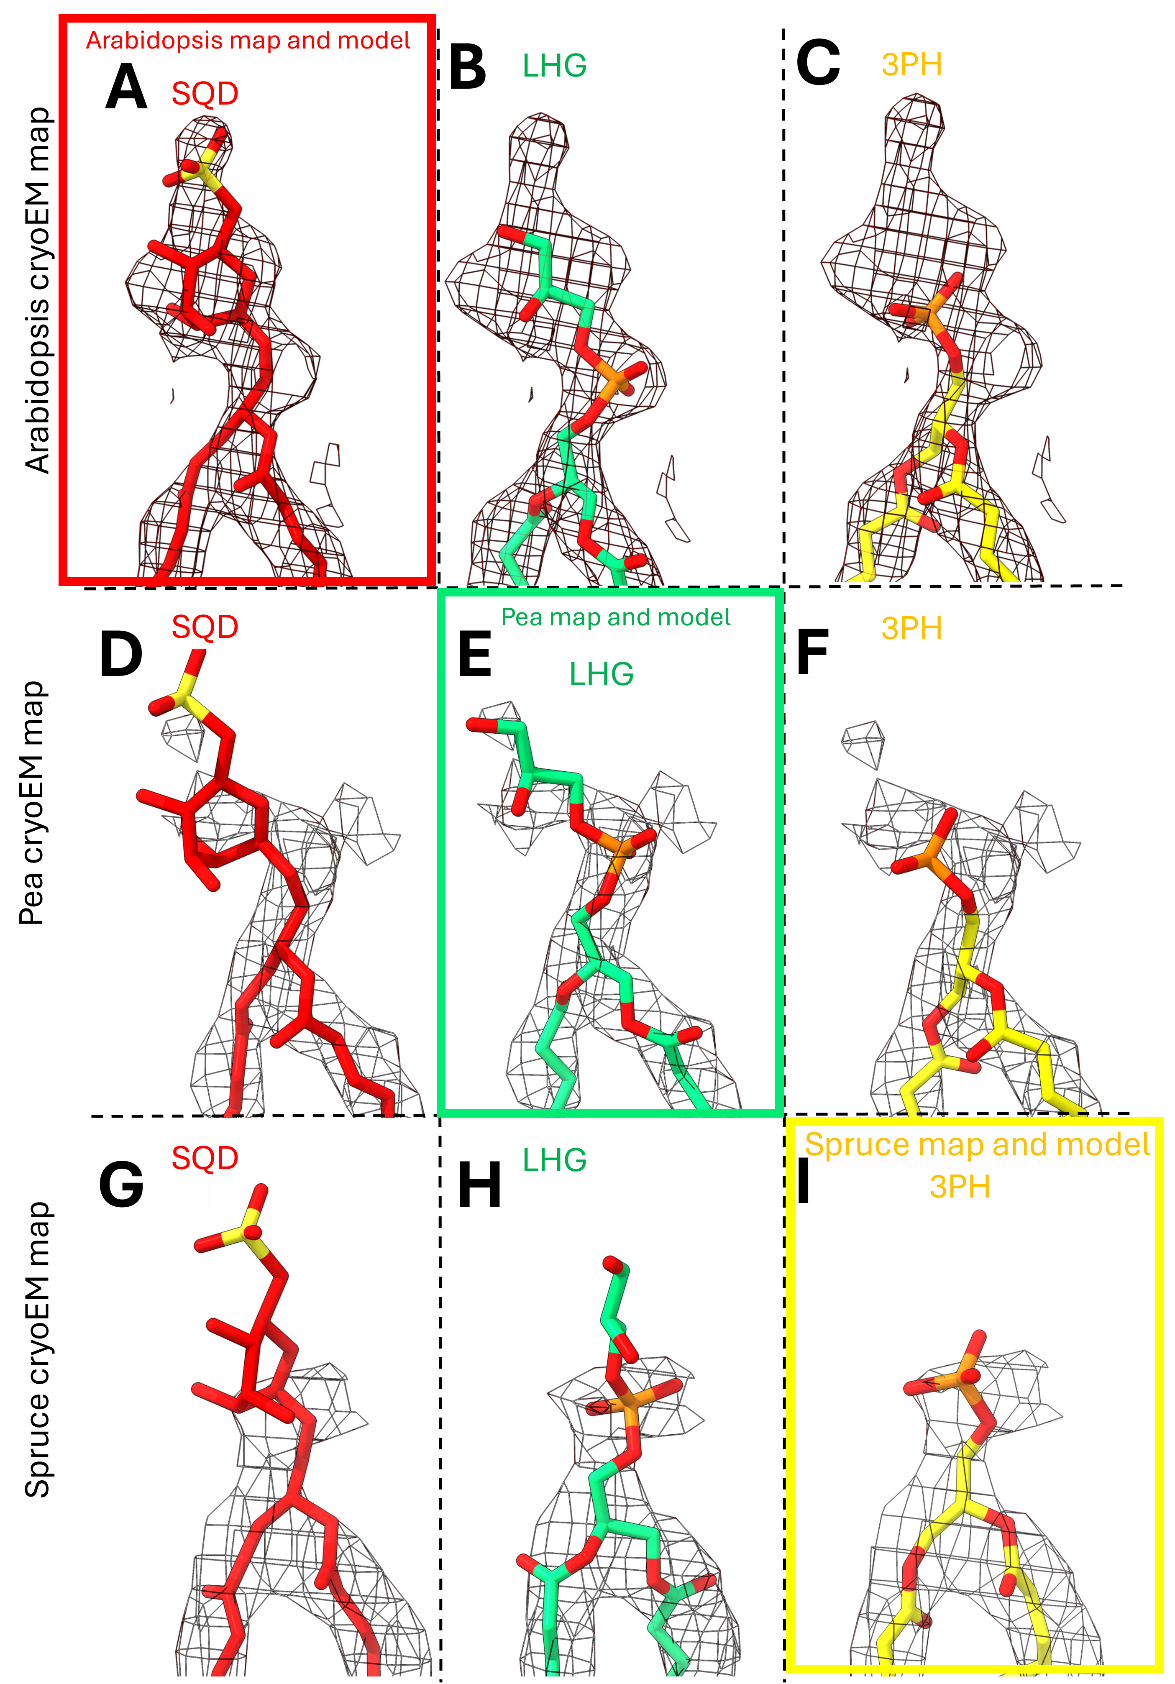


**Supplementary Figure 10:** Fitting ligands into one of the electron density blob at the s-LHCII:PS II core interface. The coulomb potential density blob is shown from the Arabidopsis map **(A-C)** (full map at 1.62 RMSD), the pea map **(D-F)** (emd_6741) and the spruce map **(G-I)** (emd_16389). Into this density blob is fit, the ligand from the Arabidopsis model sulfoquinovosyl diacylglycerol (SQD) **(A,D,G)**, the ligand from the pea model (5XNL) dipalmitoyl-phosphatidyl-glycerol (LHG) **(B,E,H)**, and the ligand from the spruce model (8C29) Phosphatidic acid (3PH) **(C,F,I)**. Coloured boxes indicate when the map and model from the same organism are used.The fittings show that the ligands from other structures do not fit well into the maps from other organisms. Suggesting that the ligand at this position differs between organisms.


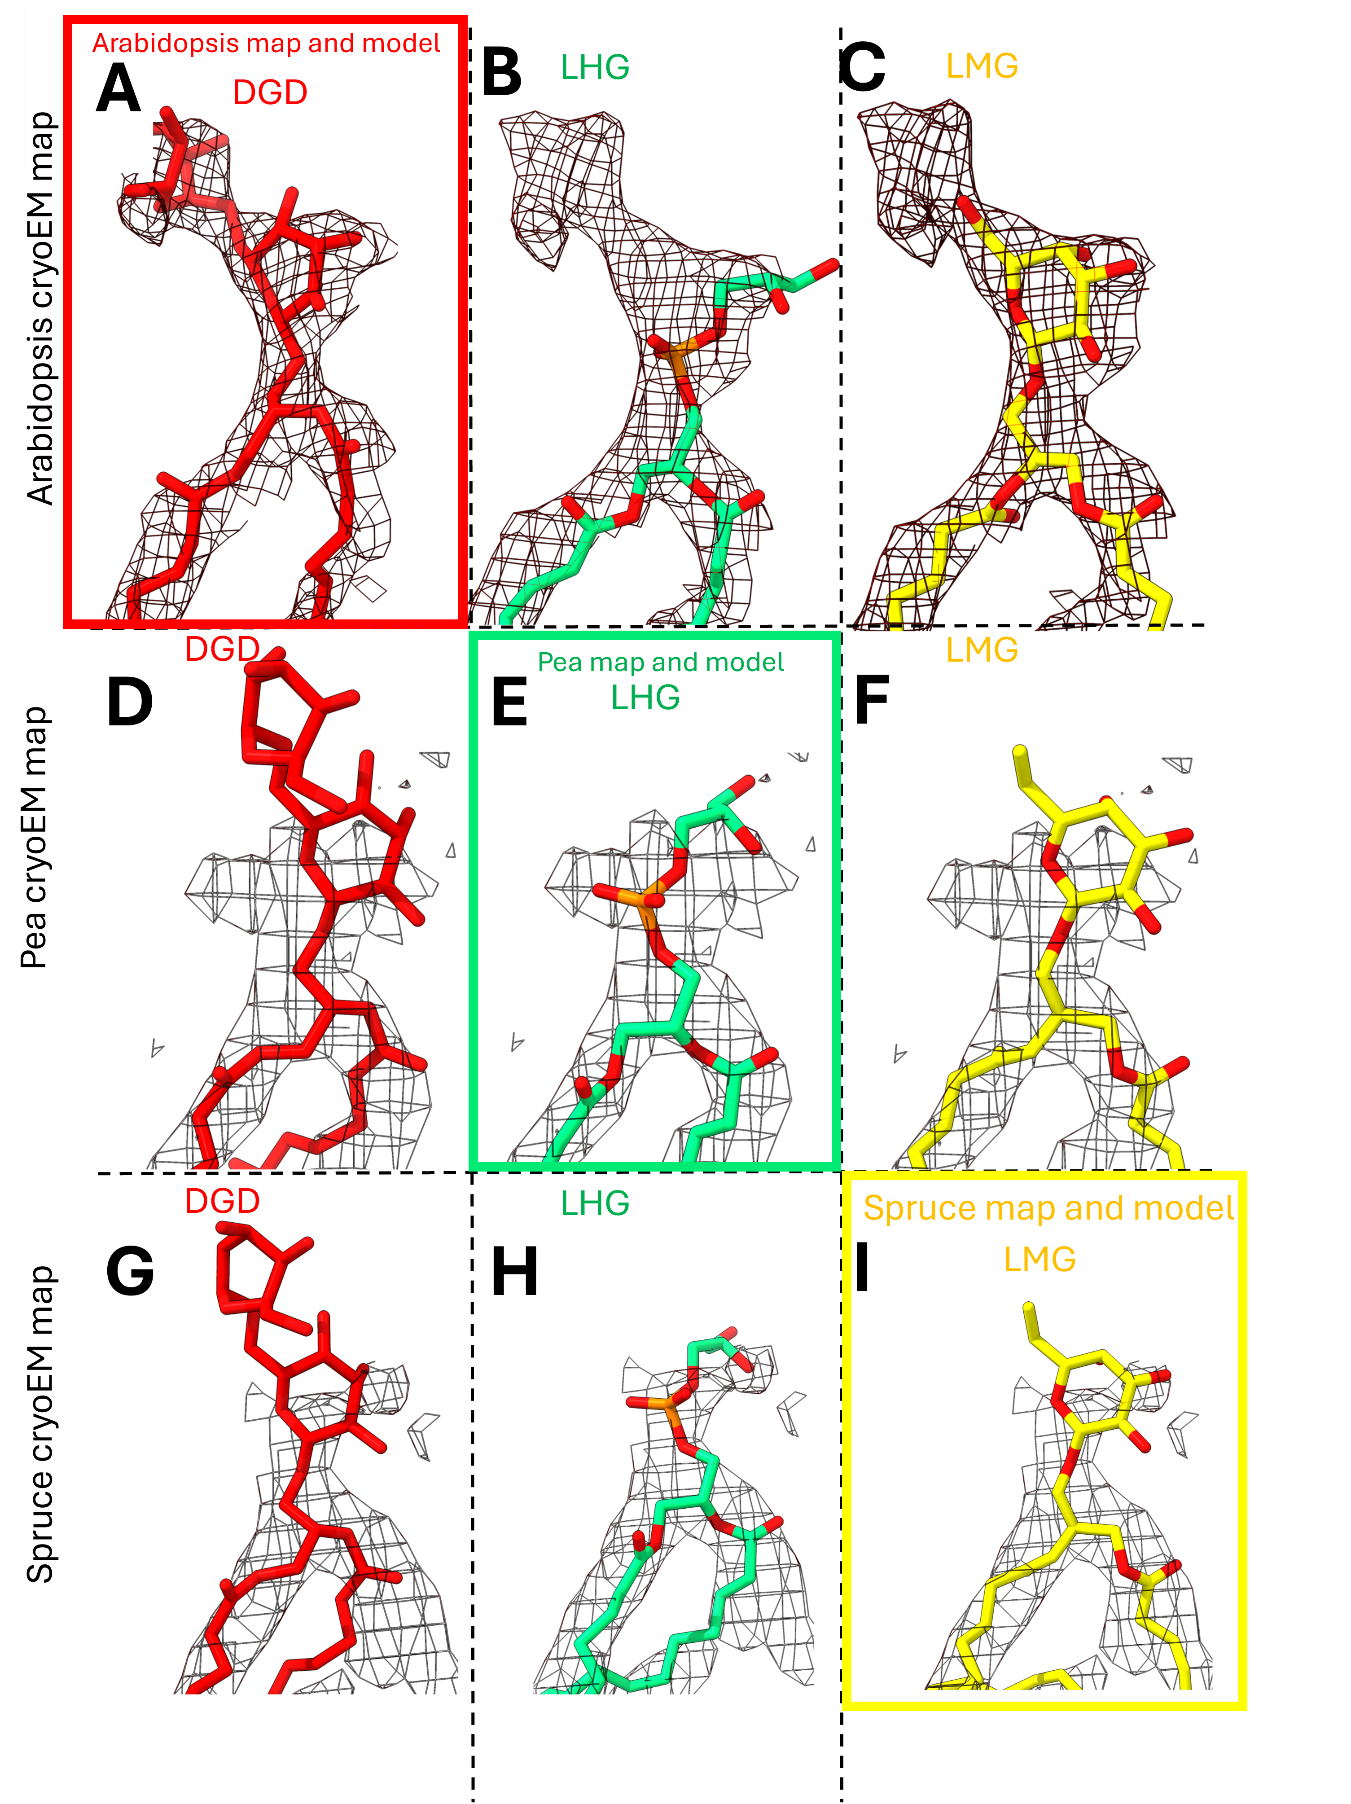


**Supplementary Figure 11:** Fitting ligands into one of the electron density blob at the s-LHCII:PS II core interface. This is a different coulomb density blob to the blob shown in Supplementary Fig. 9. The coulomb potential density blob is shown from the Arabidopsis map **(A-C)** (full map at 1.62 RMSD), the pea map **(D-F)** (emd_6741) and the spruce map **(G-I)** (emd_16389). Into this density blob is fit, the ligand from the Arabidopsis model digalactosyl diacylglycerol (DGD) **(A,D,G)**, the ligand from the pea model (5XNL) dipalmitoyl-phosphatidyl-glycerol (LHG) **(B,E,H)**, and the ligand from the spruce model (8C29) monogalactosyl-diglyceride (LMG) **(C,F,I)**. Coloured boxes indicate when the map and model from the same organism are used.The fittings show that the ligands from other structures do not fit well into the maps from other organisms. Suggesting that the ligand at this position differs between organisms.


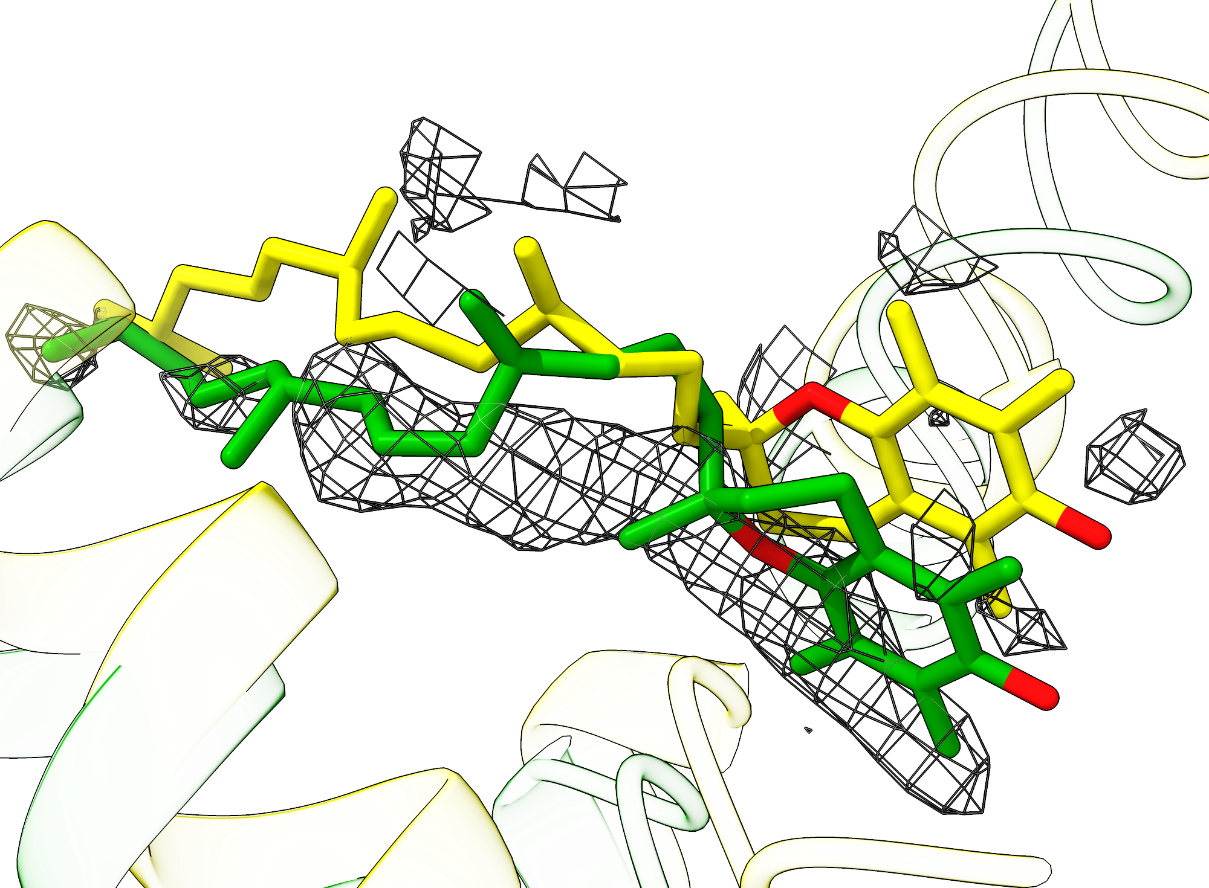


**Supplementary Figure 12:** Fitting of an α-tocopherol molecule. The putative α-tocopherol molecule which is not included in the final Arabidopsis model is shown in green, with red sections indicating oxygen atoms. The position of the α-tocopherol modelled in the spruce PS II structure (8C29) is shown in yellow. The locally sharpened coulomb potential map at a contour level of 1.29 RMSD is shown as a black mesh. The surrounding protein is shown as faint ribbons for Arabidopsis (green) and spruce (yellow).

**
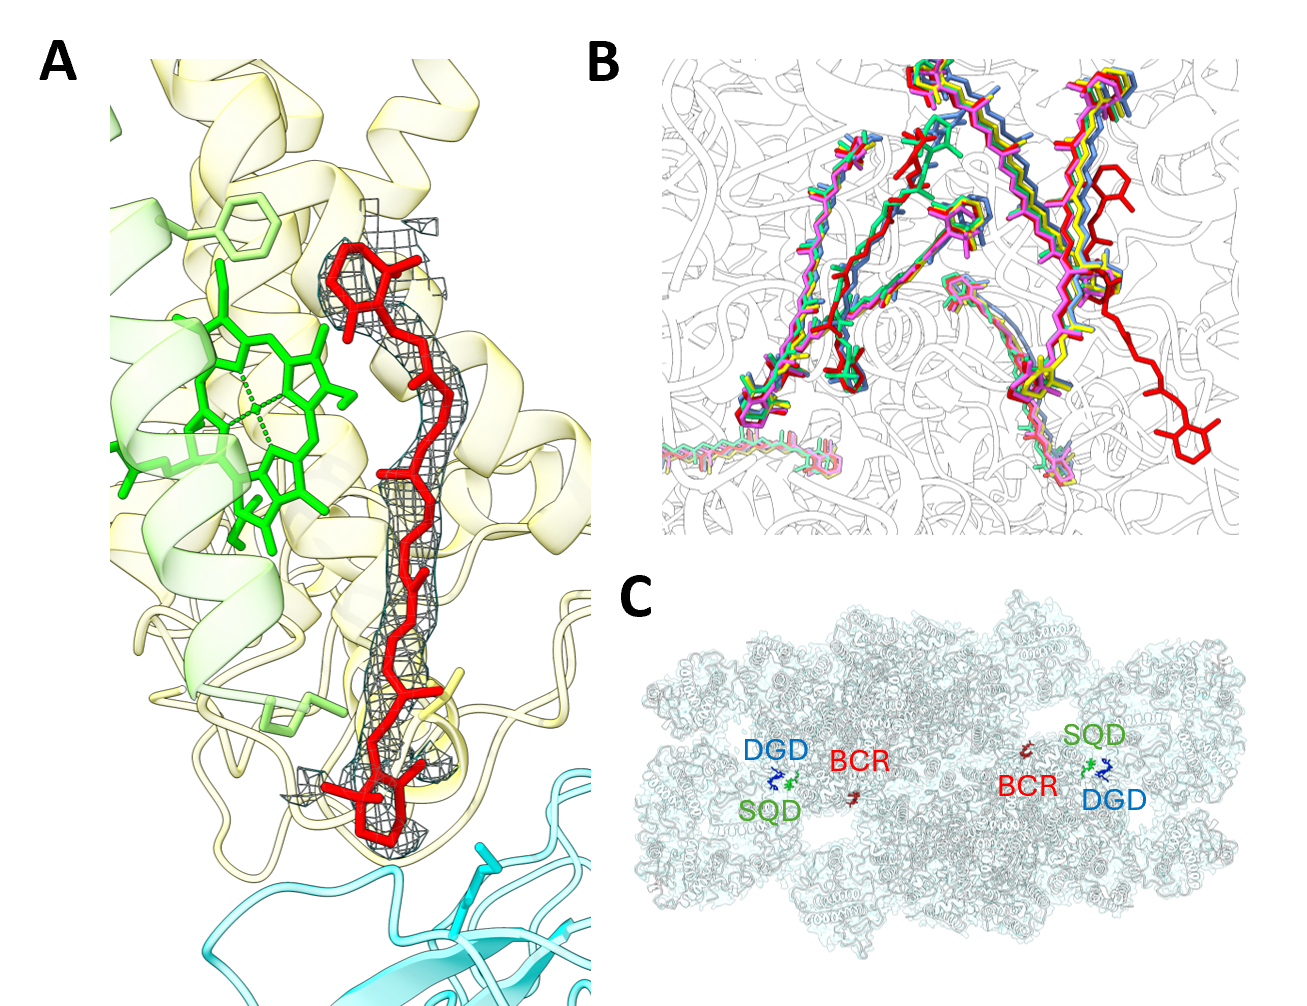
**

**Supplementary Figure 13:** The environment of a previously unmodelled β-carotene is shown for one of the monomers. The β-carotene is shown in red. The electrostatic density from the local sharpened Coulomb potential map within 1.5 Å of the β-carotene is shown at a contour level of 1.38 RMSD. The map is shown as a mesh to demonstrate the accuracy of the fitting of the new β-carotene. The nearest subunits to the new β-carotene molecule are D1 (yellow), PsbI (green) and PsbO (cyan). The nearest chlorophyll molecule (Chla:A410) is shown in lime green. The closest interactions between this new β-carotene and the surrounding proteins are: 4.1 Å to D1:Val102, 3.9 Å to PsbI:Phe15, 3.2 Å to PsbI:Met1, 3.9 Å to PsbO:Lys160, 5.2 Å to Chla:A410.


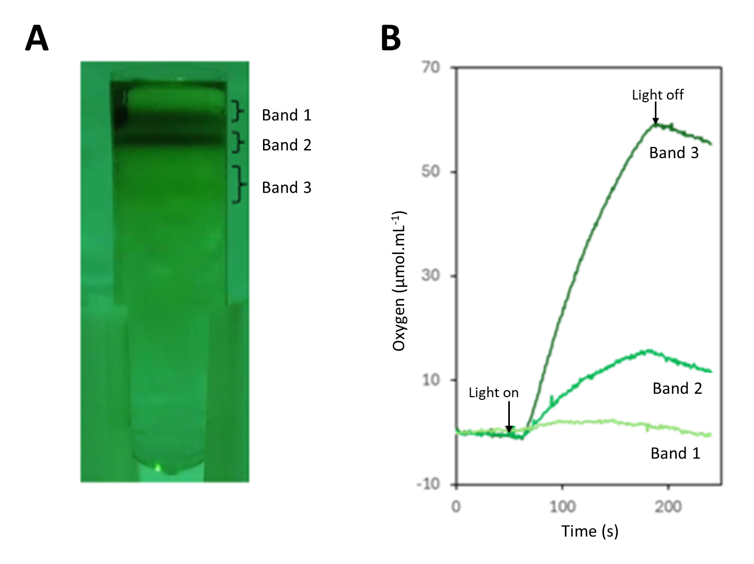


**Supplementary Figure 14:A.** 0.5 M sucrose gradient used to separate the n-dodecyl-β-maltoside (β-DM) solubilised protein complexes from *Arabidopsis thaliana* BBY membranes. **B.** Oxygen evolving activity of the different bands collected from the sucrose gradient. Oxygen evolution was measured at 10 µg Chl.mL-1 and supported using PPBQ and FeCN as electron acceptors. The initial rates of oxygen evolution for Band 1, Band 2 and Band 3 are 20, 75 and 240 µmol O2.mgChl-1.h-1, respectively.


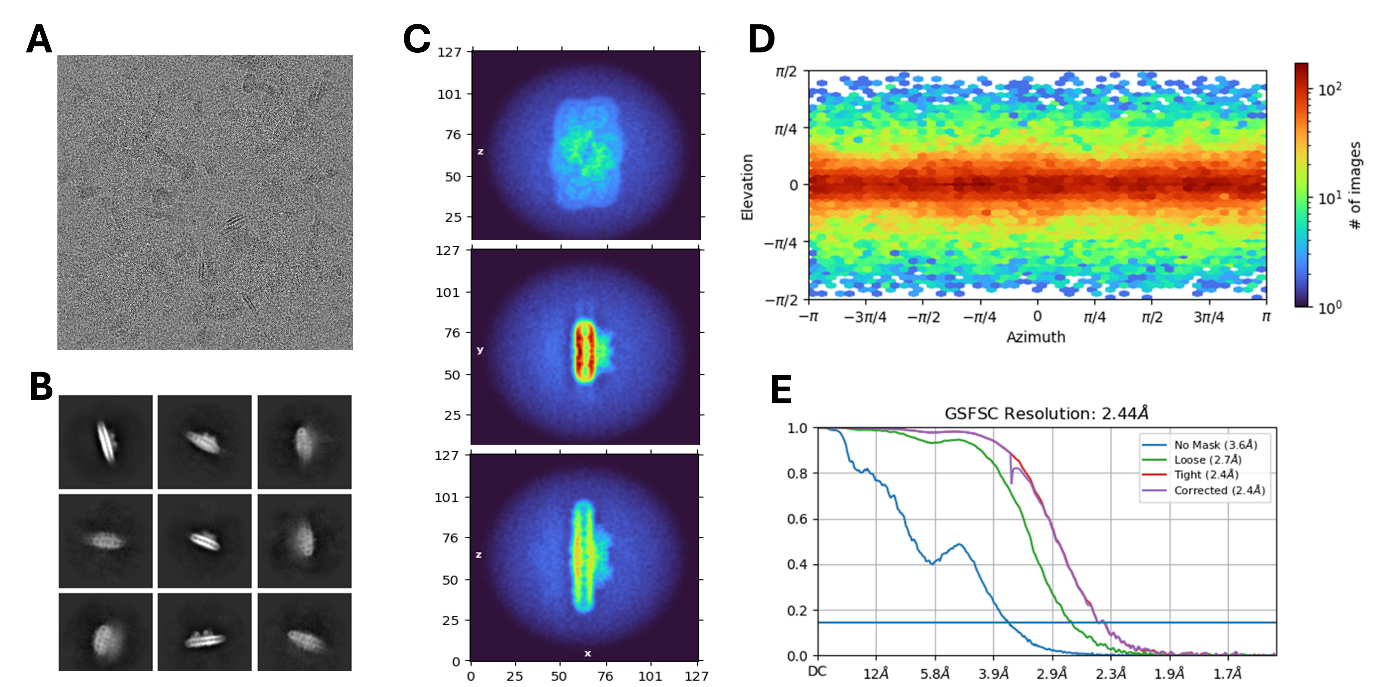


**Supplementary Figure 15:**Cryo-electron microscopy workflow. **A.** Example of one of the 16,450 micrographs collected. Micrographs were collected at 215,000 X magnification. **B.** Example of some of the 2D classes used to separate the 3,054,062 particles extracted from the micrographs into 322,522 “good particles”. **C.** Example of the best class from Ab initio reconstruction. This class was formed from 72,301 particles. **D.** Distribution of the orientation of the particles used to generate the best class from Ab initio reconstruction. **E.** Gold standard FSC curve for the refined maps from the best class of Ab initio reconstruction (**C.**).

| **Supplementary Table 1:** Statistics of cryo-EM data and structural analysis of the C2S2-type PSII supercomplex refined at 2.44 Å resolution. | |
| --- | --- |
| **Data collection and processing** |  |
| Hardware |  |
| Microscope | Titan Krios |
| Detector (mode) | FEI Falcon IV |
| Voltage (keV) | 300 |
| Spherical aberration | 2.7 |
| Magnification | 165,000 x |
| Electron exposure (e/Å2) | 40 |
| Defocus range (μm) | -0.8 to -2.0 (0.2 increments) |
| Pixel size (Å) | 0.7155 |
| Symmetry imposed | C2 |
| Initial particle images (no.) | 3,054,062 |
| Final particle images (no.) | 72 301 |
| Map resolution (Å) | 2.44 (C2S2 - masked) |
| FSC threshold | 0.143 |
| **Refinement** |  |
| Initial models used (PDB code) | 3JCU |
| Model composition |  |
| Non-hydrogen atoms | 76762 |
| Protein residues | 7544 |
| Ligands | 332 |
| Water molecules | 1208 |
| B factors (Å2) |  |
| Protein (mean) | 43.1 |
| Ligand (mean) | 43.9 |
| R.m.s. deviations |  |
| Bond lengths (Å) | 0.007 |
| Bond angles (°) | 0.889 |
| Validation |  |
| MolProbity score | 2.27 |
| Clash score | 14.9 |
| Rotamer outliers (%) | 3.5 |
| Ramachandran plot |  |
| Favored (%) | 96.99 |
| Allowed (%) | 2.89 |
| Outliers (%) | 0.12 |

| **Supplemental table 2:** Details of the individual Photosystem II subunits. The protein name is shown in bold, while the gene name is contained within parenthesis. The accession code used to identify the protein in UniProt is shown before the sequence. The sequences have amino acids letters colored in red and black: **black** letters, all the amino acids that were modelled, **red**, amino acids that are not observed in a 3D map of Arabidopsis thaliana. Each subunit is shown fit into the local sharpened electron density map at a contour level of 1.5. Each subunit from the model is shown with red sticks. The electron density map surrounding the subunit within a distance of 2 Å is shown as a blue surface. | | | | |
| --- | --- | --- | --- | --- |
| **Chain ID** | **Protein Name**  **(Gene name)** | **MW**  **(kDa)** | **Sequence (mature protein)** | **Model fit into the electrostatic potential map** |
| A,a | **D1**  (PsbA) | 37.98 | >P83755  MTAILERRESESLWGRFCNWITSTENRLYIGWFGVLMIPTLLTATSVFIIAFIAAPPVDIDGIREPVSGSLLYGNNIISGAIIPTSAAIGLHFYPIWEAASVDEWLYNGGPYELIVLHFLLGVACYMGREWELSFRLGMRPWIAVAYSAPVAAATAVFLIYPIGQGSFSDGMPLGISGTFNFMIVFQAEHNILMHPFHMLGVAGVFGGSLFSAMHGSLVTSSLIRETTENESANEGYRFGQEEETYNIVAAHGYFGRLIFQYASFNNSRSLHFFLAAWPVVGIWFTALGISTMAFNLNGFNFNQSVVDSQGRVINTWADIINRANLGMEVMHERNAHNFPLDLAA | 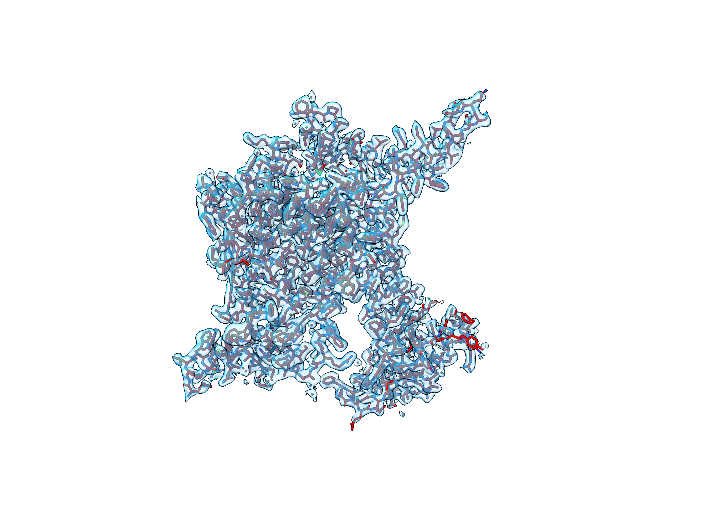 |
| B,b | **CP47**  (PsbB) | 56.04 | >P56777  MGLPWYRVHTVVLNDPGRLLAVHIMHTALVAGWAGSMALYELAVFDPSDPVLDPMWRQGMFVIPFMTRLGITNSWGGWNITGGTITNPGLWSYEGVAGAHIVFSGLCFLAAIWHWVYWDLEIFCDERTGKPSLDLPKIFGIHLFLSGVACFGFGAFHVTGLYGPGIWVSDPYGLTGKVQPVNPAWGVEGFDPFVPGGIASHHIAAGTLGILAGLFHLSVRPPQRLYKGLRMGNIETVLSSSIAAVFFAAFVVAGTMWYGSATTPIELFGPTRYQWDQGYFQQEIYRRVSAGLAENQSLSEAWAKIPEKLAFYDYIGNNPAKGGLFRAGSMDNGDGIAVGWLGHPVFRNKEGRELFVRRMPTFFETFPVVLVDGDGIVRADVPFRRAESKYSVEQVGVTVEFYGGELNGVSYSDPATVKKYARRAQLGEIFELDRATLKSDGVFRSSPRGWFTFGHASFALLFFFGHIWHGARTLFRDVFAGIDPDLDAQVEFGAFQKLGDPTTKRQAV | 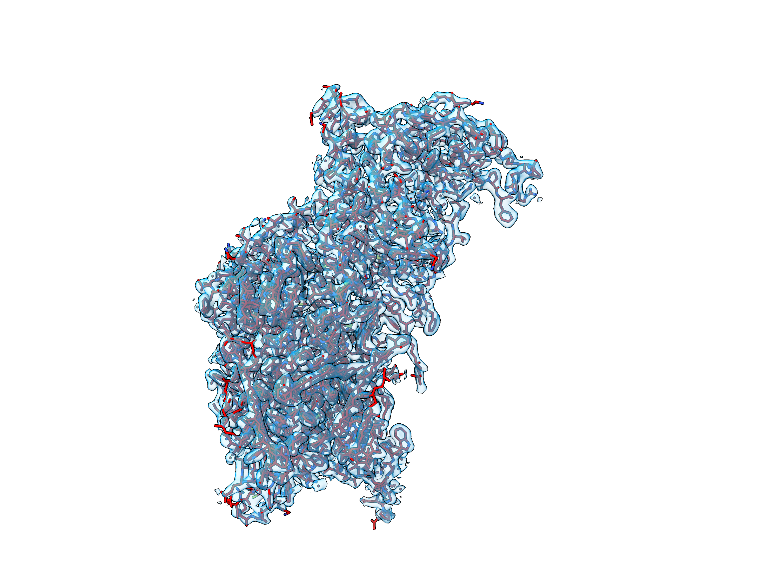 |
| C,c | **CP43**  (PsbC) | 50.04 | >P56778  TLFNGTLALAGRDQETTGFAWWAGNARLINLSGKLLGAHVAHAGLIVFWAGAMNLFEVAHFVPEKPMYEQGLILLPHLATLGWGVGPGGEVIDTFPYFVSGVLHLISSAVLGFGGIYHALLGPETLEESFPFFGYVWKDRNKMTTILGIHLILLGVGAFLLVFKALYFGGVYDTWAPGGGDVRKITNLTLSPSVIFGYLLKSPFGGEGWIVSVDDLEDIIGGHVWLGSICIFGGIWHILTKPFAWARRALVWSGEAYLSYSLAALSVCGFIACCFVWFNNTAYPSEFYGPTGPEASQAQAFTFLVRDQRLGANVGSAQGPTGLGKYLMRSPTGEVIFGGETMRFWDLRAPWLEPLRGPNGLDLSRLKKDIQPWQERRSAEYMTHAPLGSLNSVGGVATEINAVNYVSPRSWLSTSHFVLGFFLFVGHLWHAGRARAAAAGFEKGIDRDFEPVLSMTPLN | 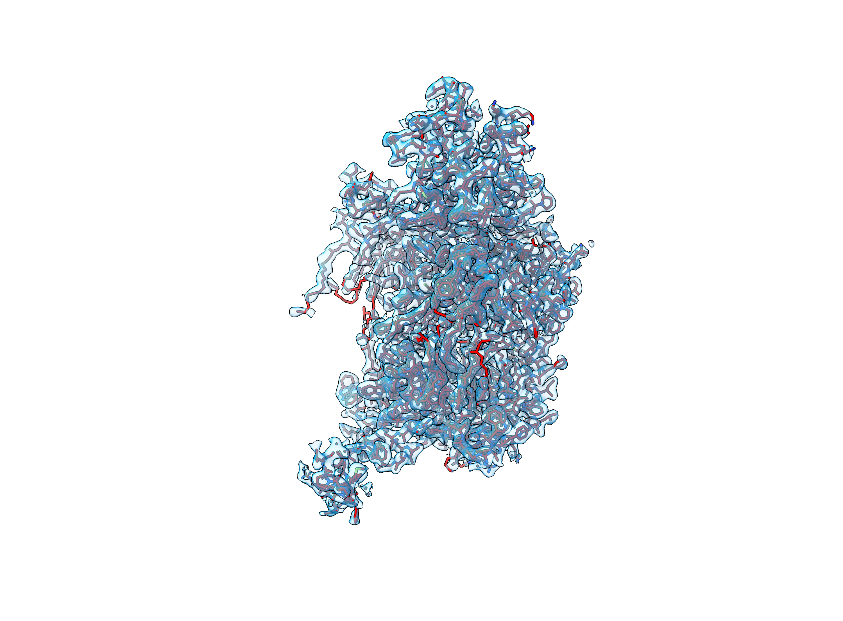 |
| D,d | **D2**  (PsbD) | 39.42 | >P56761  TIALGKFTKDEKDLFDIMDDWLRRDRFVFVGWSGLLLFPCAYFALGGWFTGTTFVTSWYTHGLASSYLEGCNFLTAAVSTPANSLAHSLLLLWGPEAQGDFTRWCQLGGLWAFVALHGAFALIGFMLRQFELARSVQLRPYNAIAFSGPIAVFVSVFLIYPLGQSGWFFAPSFGVAAIFRFILFFQGFHNWTLNPFHMMGVAGVLGAALLCAIHGATVENTLFEDGDGANTFRAFNPTQAEETYSMVTANRFWSQIFGVAFSNKRWLHFFMLFVPVTGLWMSALGVVGLALNLRAYDFVSQEIRAAEDPEFETFYTKNILLNEGIRAWMAAQDQPHENLIFPEEVLPRGNAL | 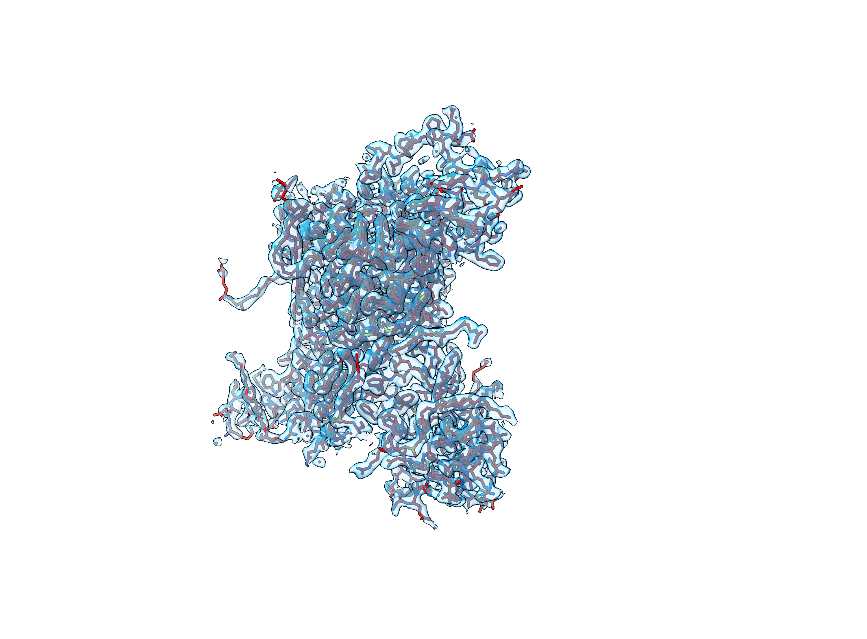 |
| E,e | **Cytochrome b559α**  (PsbE) | 9.39 | >P56779  MSGSTGERSFADIITSIRYWVIHSITIPSLFIAGWLFVSTGLAYDVFGSPRPNEYFTESRQGIPLITGRFDSLEQLDEFSRSF | 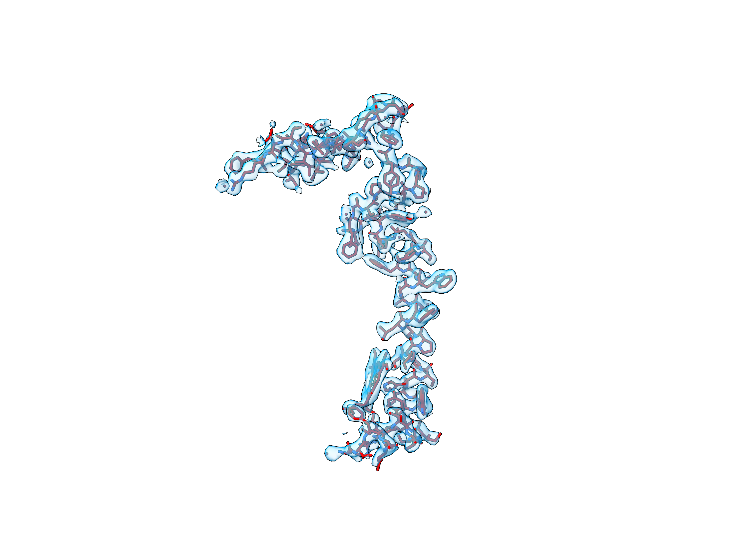 |
| F,f | **Cytochrome b559β**  (PsbF) | 4.42 | >P62095  MTIDRTYPIFTVRWLAVHGLAVPTVFFLGSISAMQFIQR | 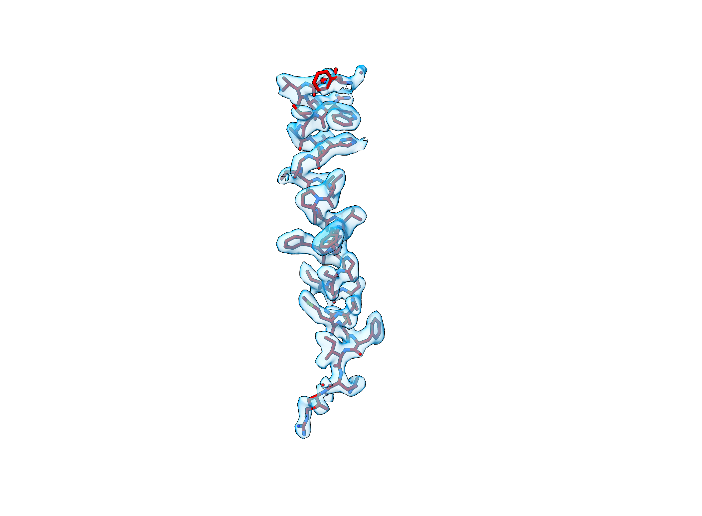 |
| H,h | **Photosystem II reaction center protein H**  (PsbH) | 7.57 | >P56780  ATQTVEDSSRSGPRSTTVGKLLKPLNSEYGKVAPGWGTTPLMGVAMALFAVFLSIILEIYNSSVLLDGISVN | 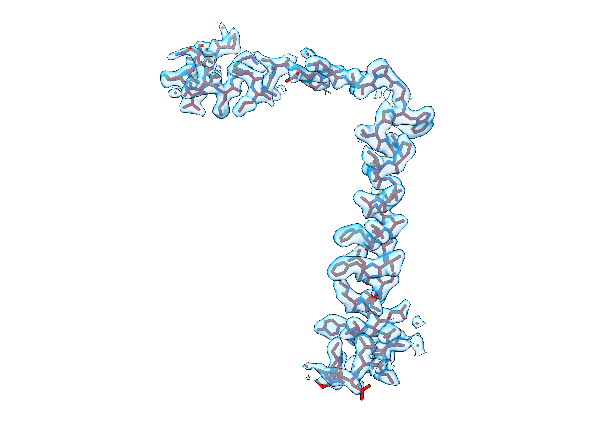 |
| I,i | **Photosystem II reaction center protein I**  (PsbI) | 4.17 | >P62100  MLTLKLFVYTVVIFFVSLFIFGFLSNDPGRNPGREE | 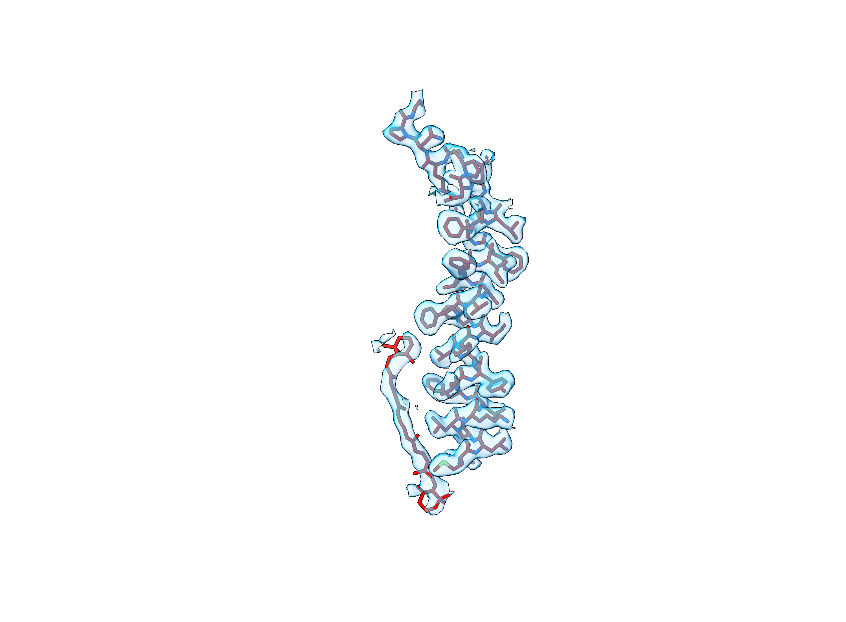 |
| J,j | **Photosystem II reaction center protein J**  (PsbJ) | 4.12 | >P56781  MADTTGRIPLWVIGTVAGILVIGLIGIFFYGSYSGLGSSL | 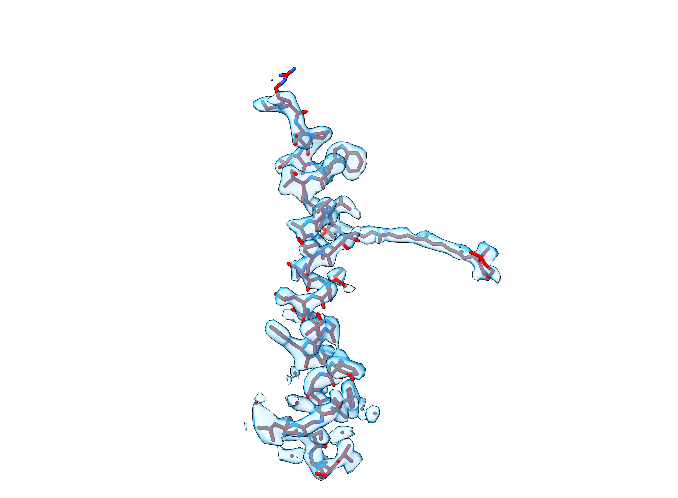 |
| K,k | **Photosystem II reaction center protein K** (PsbK) | 4.24 | >P56782  KLPEAYAFLNPIVDVMPVIPLFFLLLAFVWQAAVSFR | 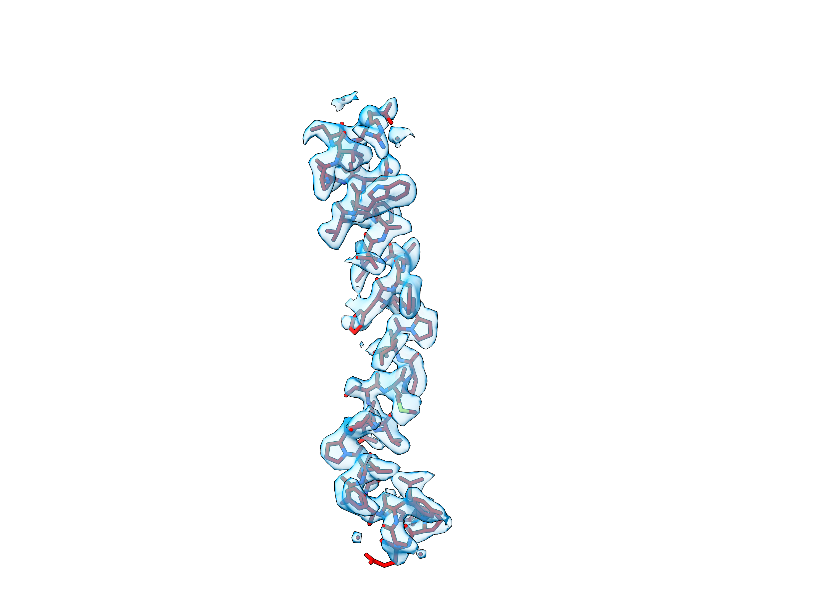 |
| L,l | **Photosystem II reaction center protein L**  (PsbL) | 4.47 | >P60129  MTQSNPNEQSVELNRTSLYWGLLLIFVLAVLFSNYFFN | 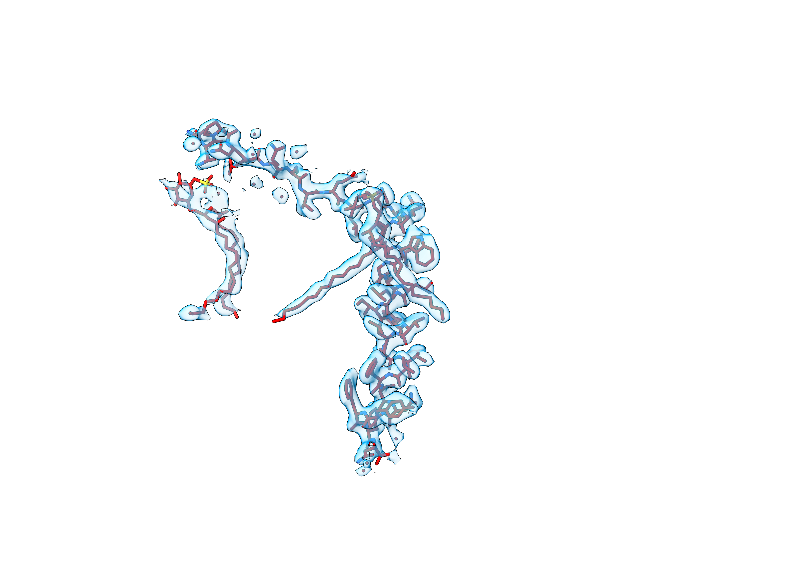 |
| M,m | **Photosystem II reaction center protein M**  (PsbM) | 3.78 | >P62109  MEVNILAFIATALFILVPTAFLLIIYVKTVSQND | 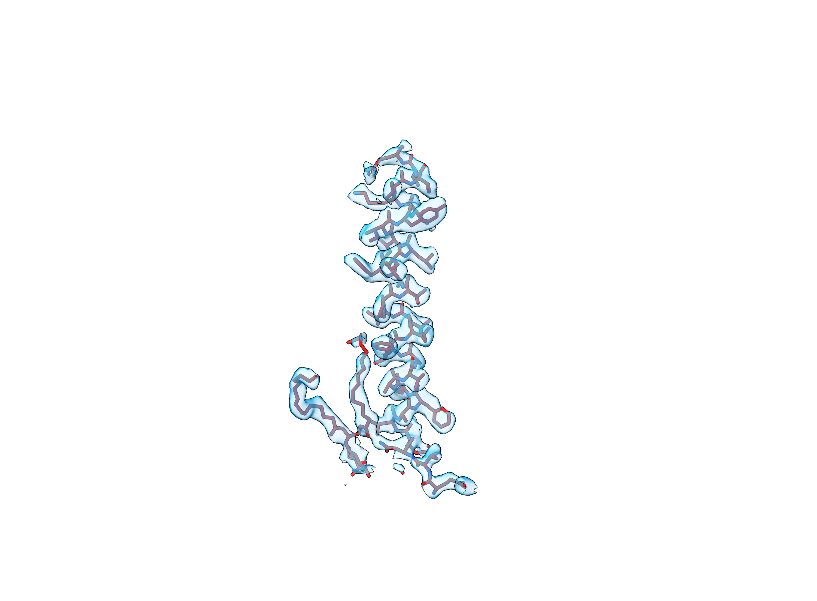 |
| O,o | **Oxygen-evolving enhancer protein 1-1**  (PsbO1) | 26.57 | >P23321  EGAPKRLTYDEIQSKTYMEVKGTGTANQCPTIDGGSETFSFKPGKYAGKKFCFEPTSFTVKADSVSKNAPPEFQNTKLMTRLTYTLDEIEGPFEVASDGSVNFKEEDGIDYAAVTVQLPGGERVPFLFTVKQLDASGKPDSFTGKFLVPSYRGSSFLDPKGRGGSTGYDNAVALPAGGRGDEEELVKENVKNTAASVGEITLKVTKSKPETGEVIGVFESLQPSDTDLGAKVPKDVKIQGVWYGQLE | 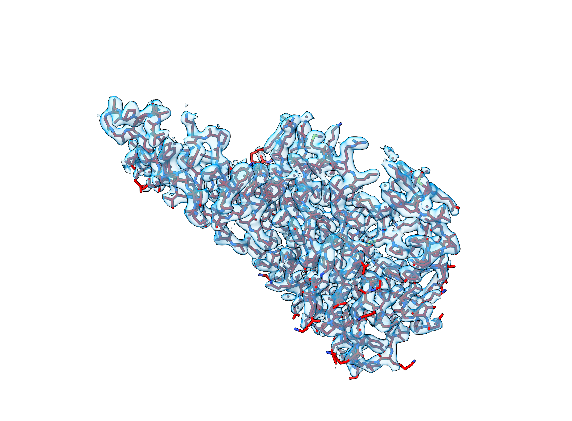 |
| P,p | **Oxygen-evolving enhancer protein 2-1** (PsbP1) | 28.10 | >Q42029  MAYSACFLHQSALASSAARSSSSSSSQRHVSLSKPVQIICKAQQSHEDDNSAVSRRLALTLLVGAAAVGSKVSPADAAYGEAANVFGKPKTNTDFLPYNGDGFKVQVPAKWNPSKEIEYPGQVLRFEDNFDATSNLNVMVTPTDKKSITDYGSPEEFLSQVNYLLGKQAYFGETASEGGFDNNAVATANILESSSQEVGGKPYYYLSVLTRTADGDEGGKHQLITATVNGGKLYICKAQAGDKRWFKGARKFVESAATSFSVA | 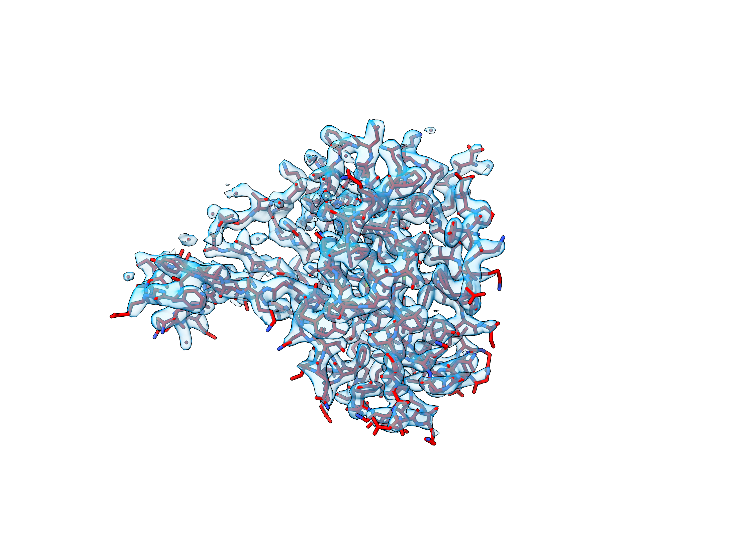 |
| Q,q | **Oxygen-evolving enhancer protein 3-1**  (PsbQ1) | 23.87 | >Q9XFT3  MASMGGLHGASPAVLEGSLKINGSSRLNGSGRVAVAQRSRLVVRAQQSEETSRRSVIGLVAAGLAGGSFVQAVLADAISIKVGPPPAPSGGLPAGTDNSDQARDFALALKDRFYLQPLPPTEAAARAKESAKDIINVKPLIDRKAWPYVQNDLRSKASYLRYDLNTIISSKPKDEKKSLKDLTTKLFDTIDNLDYAAKKKSPSQAEKYYAETVSALNEVLAKLG | 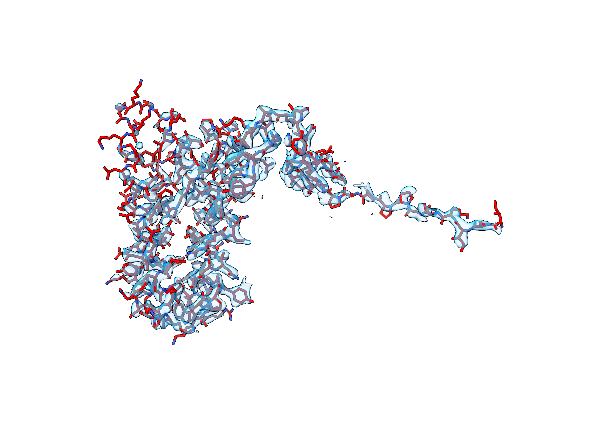 |
| T,t | **Photosystem II reaction center protein Tc**  (PsbTc) | 3.82 | >P61839  MEALVYTFLLVSTLGIIFFAIFFREPPKISTKK | 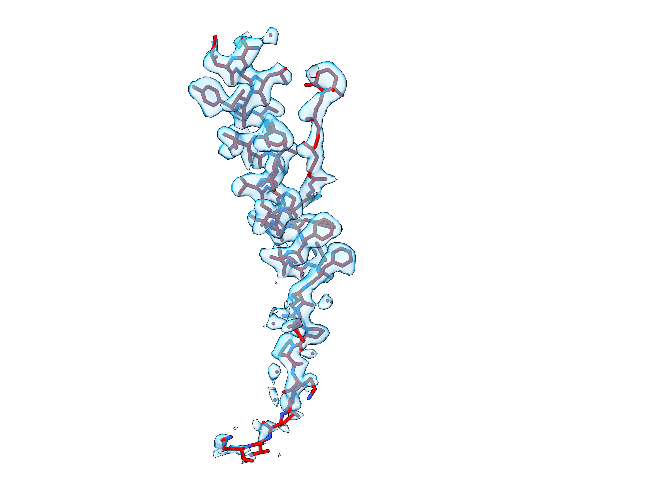 |
| U,u | **Photosystem II reaction center protein Tn**  (PsbTn) | 3.17 | >Q39195  EPKRGTEAAKKKYAQVCVTMPTAKICRY | 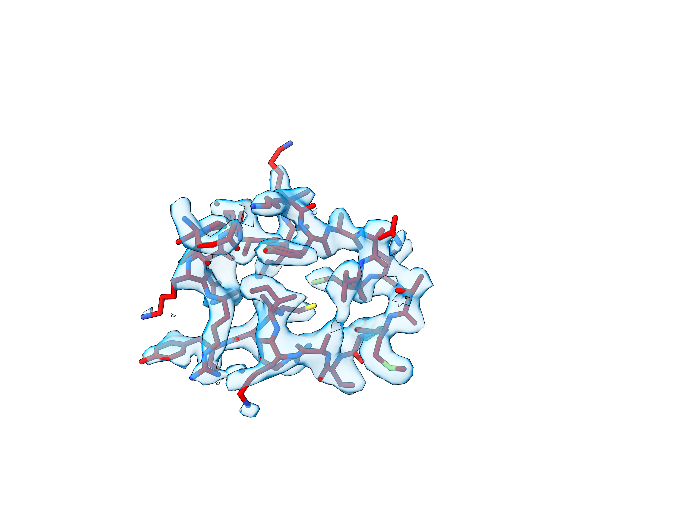 |
| W,w | **Photosystem II reaction center W protein**  (PsbW) | 6.04 | >Q39194  LVDERMSTEGTGLPFGLSNNLLGWILFGVFGLIWTFFFVYTSSLEEDEESGLSL | 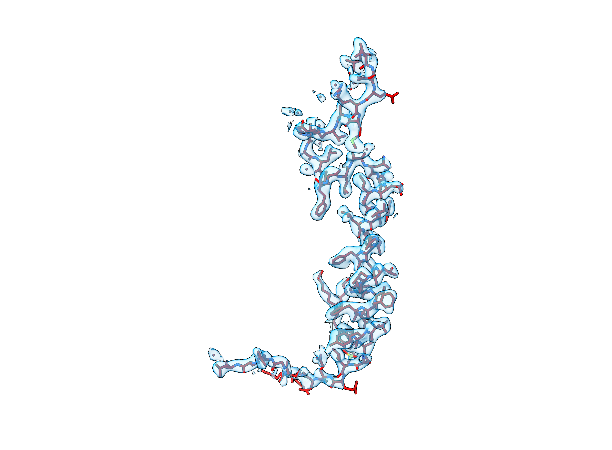 |
| X,x | **Photosystem II reaction center protein X**  (PSII-X) | 4.18 | >Q9SKI3  AGSGISPSLKNFLLSIASGGLVLTVIIGVVVGVSNFDPVKRT | 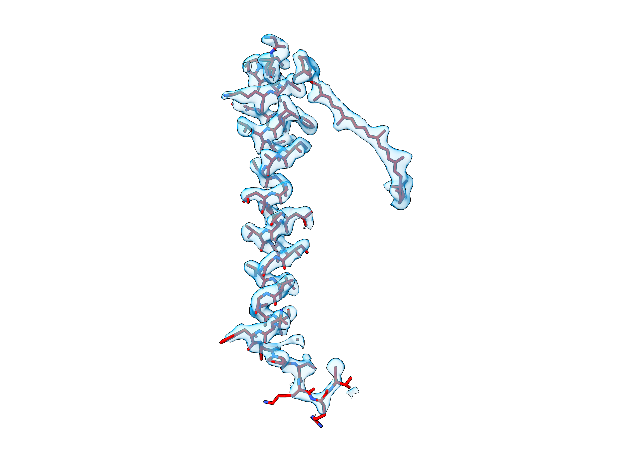 |
| Z,z | **Photosystem II reaction center protein Z**  (PsbZ) | 6.57 | >P56790  MTIAFQLAVFALIITSSILLISVPVVFASPDGWSSNKNVVFSGTSLWIGLVFLVGILNSLIS | 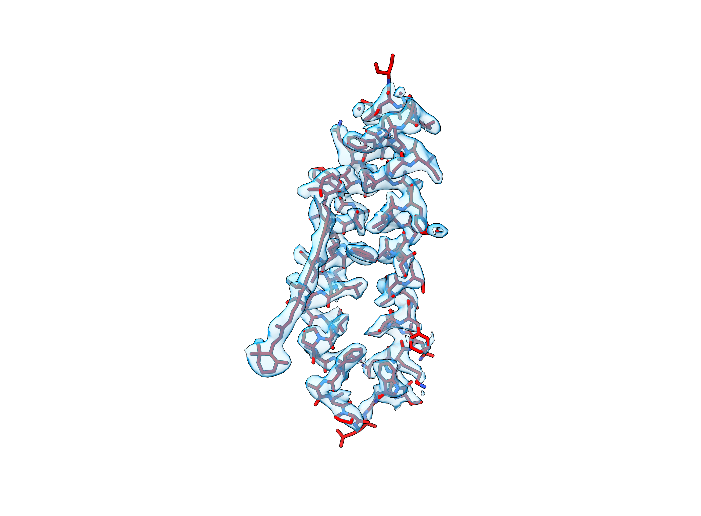 |
| G,g | **Chlorophyll a-b binding protein 1**  **(**LHCB1.3) | 24.86 | >P04778  RKTVAKPKGPSGSPWYGSDRVKYLGPFSGESPSYLTGEFPGDYGWDTAGLSADPETFARNRELEVIHSRWAMLGALGCVFPELLARNGVKFGEAVWFKAGSQIFSDGGLDYLGNPSLVHAQSILAIWATQVILMGAVEGYRVAGNGPLGEAEDLLYPGGSFDPLGLATDPEAFAELKVKELKNGRLAMFSMFGFFVQAIVTGKGPIENLADHLADPVNNNAWAWAFATN | 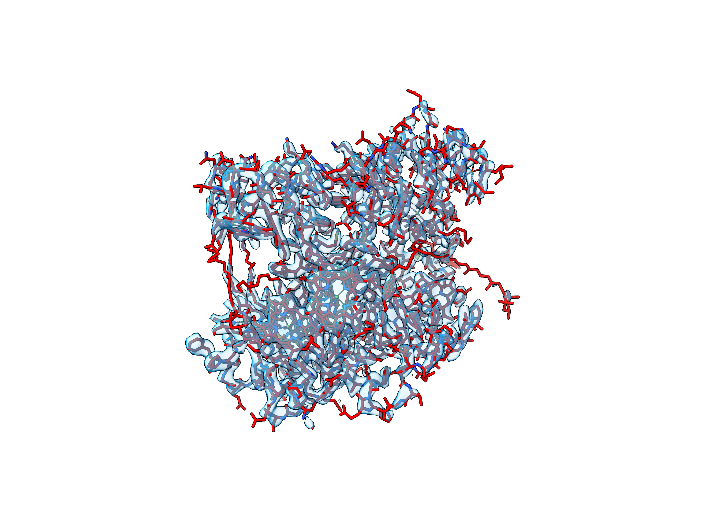 |
| N,n | **Chlorophyll a-b binding protein 1**  **(**LHCB1.3) | 24.86 | >P04778  RKTVAKPKGPSGSPWYGSDRVKYLGPFSGESPSYLTGEFPGDYGWDTAGLSADPETFARNRELEVIHSRWAMLGALGCVFPELLARNGVKFGEAVWFKAGSQIFSDGGLDYLGNPSLVHAQSILAIWATQVILMGAVEGYRVAGNGPLGEAEDLLYPGGSFDPLGLATDPEAFAELKVKELKNGRLAMFSMFGFFVQAIVTGKGPIENLADHLADPVNNNAWAWAFATN | 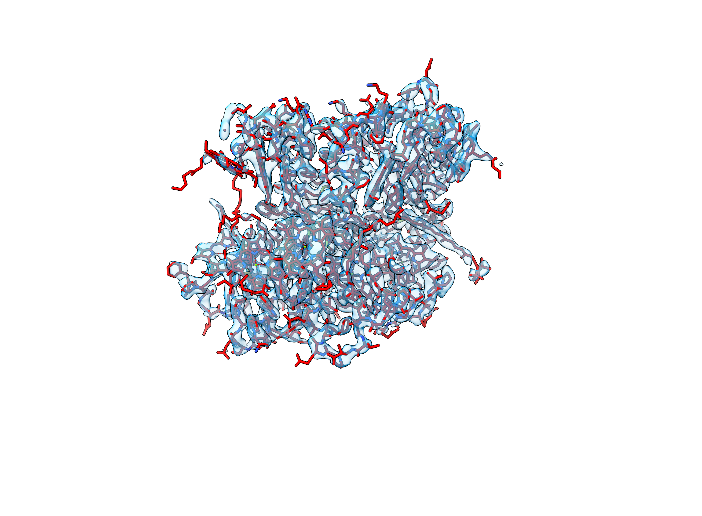 |
| Y,y | **Chlorophyll a-b binding protein 1**  **(**LHCB1.3) | 24.86 | >P04778  RKTVAKPKGPSGSPWYGSDRVKYLGPFSGESPSYLTGEFPGDYGWDTAGLSADPETFARNRELEVIHSRWAMLGALGCVFPELLARNGVKFGEAVWFKAGSQIFSDGGLDYLGNPSLVHAQSILAIWATQVILMGAVEGYRVAGNGPLGEAEDLLYPGGSFDPLGLATDPEAFAELKVKELKNGRLAMFSMFGFFVQAIVTGKGPIENLADHLADPVNNNAWAWAFATN | 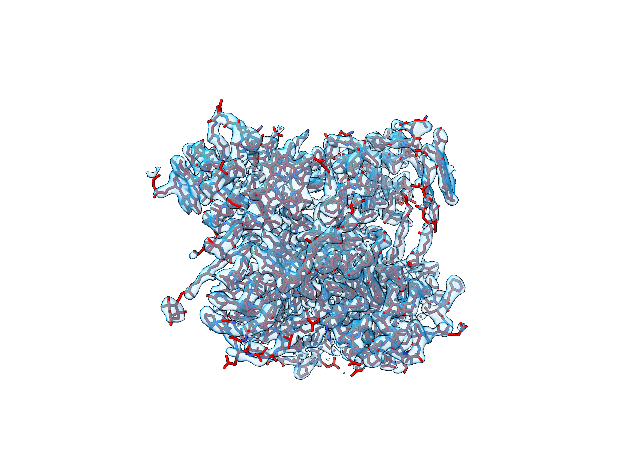 |
| R,r | **CP29**  (LHCB4.2) | 28.16 | >Q07473  AAPKKSAKKTVTTDRPLWYPGAISPDWLDGSLVGDYGFDPFGLGKPAEYLQFDIDSLDQNLAKNLAGDVIGTRTEAADAKSTPFQPYSEVFGIQRFRECELIHGRWAMLATLGALSVEWLTGVTWQDAGKVELVDGSSYLGQPLPFSISTLIWIEVLVIGYIEFQRNAELDSEKRLYPGGKFFDPLGLAADPEKTAQLQLAEIKHARLAMVAFLGFAVQAAATGKGPLNNWATHLSDPLHTTIIDTFSSS | 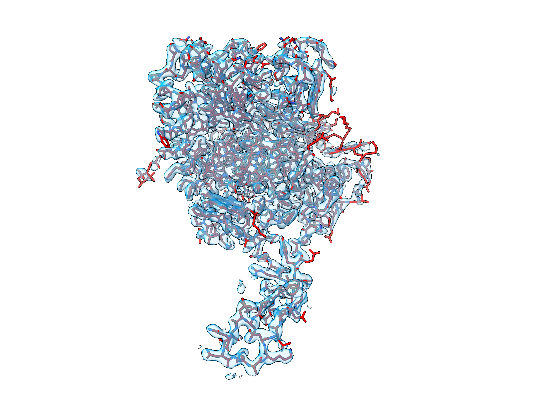 |
| S,s | **CP26**  (LHCB5) | 25.21 | >Q9XF89  SKAVSETSDELAKWYGPDRRIFLPDGLLDRSEIPEYLNGEVAGDYGYDPFGLGKKPENFAKYQAFELIHARWAMLGAAGFIIPEALNKYGANCGPEAVWFKTGALLLDGNTLNYFGKNIPINLVLAVVAEVVLLGGAEYYRITNGLDFEDKLHPGGPFDPLGLAKDPEQGALLKVKEIKNGRLAMFAMLGFFIQAYVTGEGPVENLAKHLSDPFGNNLLTVIAGTAERAPTL | 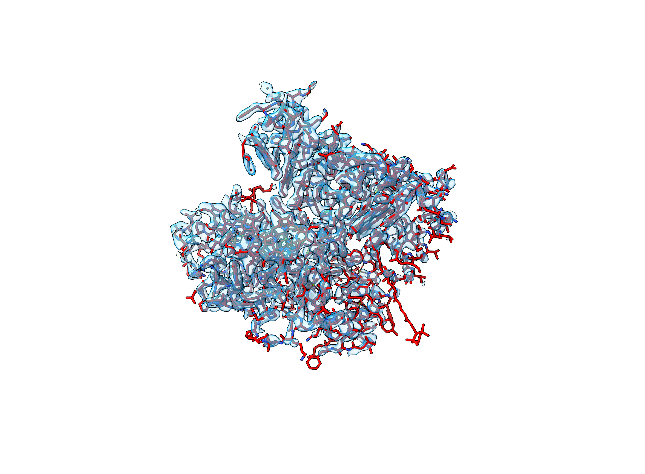 |

| **Supplemental table 3:** Details of various ligands found within the structure. | | |
| --- | --- | --- |
| **Ligand Name** | **3-letter Code** | **# of ligands (full dimer)** |
| β-CAROTENE | BCR | 22 |
| BICARBONATE ION | BCT | 2 |
| CHLOROPHYLL B | CHL | 50 |
| CHLORIDE ION | CL | 4 |
| CHLOROPHYLL A | CLA | 156 |
| DIGALACTOSYL DIACYL GLYCEROL (DGDG) | DGD | 10 |
| FE (II) ION | FE2 | 2 |
| PROTOPORPHYRIN IX CONTAINING FE | HEM | 2 |
| WATER | HOH | 1208 |
| 1,2-DIPALMITOYL-PHOSPHATIDYL-GLYCEROLE | LHG | 18 |
| 1,2-DISTEAROYL-MONOGALACTOSYL-DIGLYCERIDE | LMG | 10 |
| DODECYL-BETA-D-MALTOSIDE | LMT | 2 |
| (3R,3'R,6S)-4,5-DIDEHYDRO-5,6-DIHYDRO-BETA,BETA-CAROTENE-3,3'-DIOL | LUT | 18 |
| (3S,5R,6R,3'S,5'R,6'S)-5',6'-EPOXY-6,7-DIDEHYDRO- 5,6,5',6'-TETRAHYDRO-BETA,BETA-CAROTENE-3,5,3'-TRIOL; 9'-CIS-NEOXANTHIN | NEX | 10 |
| CA-MN4-O5 CLUSTER | OEX | 2 |
| PHEOPHYTIN A | PHO | 4 |
| 2,3-DIMETHYL-5-(3,7,11,15,19,23,27,31,35-NONAMETHYL-2,6,10,14,18,22,26,30,34-HEXATRIACONTANONAENYL-2,5-CYCLOHEXADIENE-1,4-DIONE-2,3-DIMETHYL-5-SOLANESYL-1,4-BENZOQUINONE | PL9 | 4 |
| 1,2-DI-O-ACYL-3-O-[6-DEOXY-6-SULFO-ALPHA-D-GLUCOPYRANOSYL]-SN-GLYCEROL | SQD | 8 |
| (3S,5R,6S,3'S,5'R,6'S)-5,6,5',6'-DIEPOXY-5,6,5',6'- TETRAHYDRO-BETA,BETA-CAROTENE-3,3'-DIOL | XAT | 8 |
